# Supplementary material
Source: PubMed Central journal article supplement (PMC5851598)
Supplement: NIHMS949036-supplement-Supporting_Information.pdf [file NIHMS949036-supplement-Supporting_Information.pdf]

## Supporting Information

### Human DNA repair genes possess potential G-quadruplex sequences in their promoters and 5'-untranslated regions

Aaron M. Fleming,\* Judy Zhu, Yun Ding, Josh A. Visser, Julia Zhu, and Cynthia J. Burrows\*

Department of Chemistry, University of Utah, Salt Lake City, UT 84112-0850, USA

\*To whom correspondence should be addressed.

E-mails: [burrows@chem.utah.edu](mailto:burrows@chem.utah.edu) or [afleming@chem.utah.edu](mailto:afleming@chem.utah.edu)

| <b>Item</b>                                                                                                 | <b>Page</b> |
|-------------------------------------------------------------------------------------------------------------|-------------|
| <b>Additional materials and methods</b>                                                                     | 2           |
| <b>Table S1.</b> PQSs in promoters and 5'-UTRs of human DNA repair genes.                                   | 4           |
| <b>Table S2.</b> The 37 human DNA repair genes without a PQS in their promoters or 5'-UTRs.                 | 5           |
| <b>Table S3.</b> PQSs in the promoters and 5'-UTRs of all human genes.                                      | 6           |
| <b>Table S4.</b> DNA Repair Promoter and 5'-UTR PQSs found in the BG4 G4 ChIP-Seq Data.                     | 7           |
| <b>Table S5.</b> DNA Repair Promoter and 5'-UTR PQSs found in the XPB/XPD ChIP-Seq Data.                    | 15          |
| <b>Table S6.</b> Genes with PQSs common to the BG4 ChIP-Seq and XPB/XPD ChIP-Seq Data Sets.                 | 21          |
| <b>Figure S1.</b> <sup>1</sup> H-NMR, CD, TDS, <i>T<sub>m</sub></i> , and ThT data for the 30 PQSs studied. | 23          |
| <b>Figure S2.</b> Native PAGE for the 30 PQSs.                                                              | 53          |
| <b>Figure S3.</b> Probability of folding for the 30 PQSs studied.                                           | 55          |
| <b>References</b>                                                                                           | 56          |

## Additional materials and methods

**Plasmid Preparation.** The plasmids were constructed from the psiCHECK2 plasmid (Promega) that has coding sequences for the Renilla luciferase (Rluc) and firefly luciferase (luc) genes. The luc gene is regulated by the HSV-TK promoter that was not modified and used as the internal standard to conduct the Dual-Glo luciferase assay (Promega). The Rluc gene was originally regulated by the SV40 early enhancer/promoter, which we modified by replacing the TATA-box with the potential G-quadruplex sequences (PQS) of interest. Additionally, the PQS was flanked by recognition sequences for the Nt.BspQ1 nicking endonuclease. Insertion of the PQS and nicking endonuclease recognition sequences was achieved using restriction free cloning. The cloning experiment was conducted in a 25- $\mu$ L reaction with 1x Phusion reaction buffer (NEB), 200  $\mu$ M dNTPs, 1  $\mu$ M each of the forward and reverse primers, 1,000 ng of psiCHECK2 plasmid, 3% DMSO, and 0.5 units of Phusion DNA polymerase. The PCR was initiated with a 98 °C denaturation step for 30 sec followed by 30 cycles of PCR consisting of a 98 °C denaturation step for 20 sec, a 55 °C annealing step for 30 sec, a 72 °C extension step for 5 min, and a post step consisting of 98 °C for 8 sec followed by 72 °C for 5 min. After the 30 cycles, a final extension step of 72 °C for 5 min was conducted. Following PCR, the samples were digested with Dpn1 by adding 2.3  $\mu$ L of Dpn1 reaction buffer and 5 units of Dpn1 to the PCR reaction vessel. The Dpn1 reaction was conducted for 2 hr at 37 °C followed by heat quenching at 80 °C for 20 min.

The PCR and Dpn1 digested reaction was then transformed using NEB 5-alpha competent *E. coli* following the manufacturer's protocol. After transformation, 50-100  $\mu$ L from the transformation was spread on a pre-warmed agar plate containing ampicillin (100  $\mu$ g/mL). The plates were incubated overnight at 37 °C. Next, individual colonies were picked and each grown overnight at 37 °C in 5 mL of lysogeny broth media containing ampicillin (100  $\mu$ g/mL). The plasmid DNA from each grown sample was then purified using a miniprep kit (Qiagen) following the manufacturer's protocols. Last, ~200 ng of plasmid and 1  $\mu$ M sequencing forward primer in 15  $\mu$ L of 10 mM Tris (pH 8.0) was submitted for Sanger sequencing at the DNA sequencing core at the University of Utah.

Insertion of site-specific modifications into the plasmids was achieved following literature protocols.<sup>1,2</sup> Specifically, 5  $\mu$ g of plasmid with Nt.BspQ1 recognition sequences flanking the site in which the DNA base modification will be inserted was placed in 50  $\mu$ L of 1x Nt.BspQ1 reaction buffer with 5 units of Nt.BspQ1. The reaction was placed at 50 °C for 60 min followed by heat quenching at 80 °C for 20 min. Next, 1 nmole (~1000x) of 5'-phosphorylated oligomer with the site-specific modification was added to the quenched reaction. The modified oligomers were made by solid-phase synthesis in the DNA/Peptide core facility at the University of Utah. They were cleaved, deprotected, and HPLC purified following protocols previously outlined.<sup>3</sup> The plasmid oligomer mixture was thermal cycled by heating at 80 °C for 2 min followed by cooling on ice for 2 min, which was repeated four times. The nicks were then sealed using T4 DNA ligase, by adding 6  $\mu$ L of 10x ligase buffer and 800 units of ligase. The ligation reaction was left at 20 °C for 4 h. To induce supercoiling into the plasmids, they were treated with 5 units of gyrase for 1 h (see Supplementary Fig. 1 for a schematic of this method). The modified, supercoiled plasmids were purified from the protein and excess insert using an Ultra Clean PCR cleanup kit (Mo Bio) following the manufacturer's protocol. Plasmid concentrations were determined by nanodrop UV-vis measurements.

To confirm the DNA modifications were introduced into the plasmid, we applied a protocol established in our laboratory, in which the modification was removed by a DNA glycosylase to yield a ligatable gap.<sup>4</sup> By ligating the gap, Sanger sequencing provided a characteristic nucleotide loss at the modification site to confirm the presence of the modification. Complete details of the method can be found in our recent publication.<sup>4</sup>

### PCR Primer Sequences

#### Insertion of the *NEIL1* PQS

5' - AGC TCA GAG GCC GAG GCG GCC TCG GCC TCT GCG CTC TTC CCC GGG CCT GGG GGA  
GGG AAA GGG CCG CTC TTC TGT CAG CCA TGG GGC GGA GAA TGG GCG GAA CTG

5'- CAG TTC CGC CCA TTC TCC GCC CCA TGG CTG ACA GAA GAG CGG CCC TTT CCC TCC CCC  
AGG CCC GGG GAA GAG CGC AGA GGC CGA GGC CGC CTC GGC CTC TGA GCT

Insertion of the *BLM* PQS

5'- CAG TTC CGC CCA TTC TCC GCC CCA TGG CTG ACG CTC TTC CGA GGG AGG GGC GGG  
AGG GAA GCT CTT CTG CAG AGG CCG AGG CCG CCT CGG CCT CTG AGC T

5'- AGC TCA GAG GCC GAG GCG GCC TCG GCC TCT GCA GAA GAG CTT CCC TCC CGC CCC  
TCC CTC GGA AGA GCG TCA GCC ATG GGG CGG AGA ATG GGC GGA ACT G

Insertion of the *MGMT* PQS

5'- AGC TCA GAG GCC GAG GCG GCC TCG GCC TCT GCG CTC TTC CGG GGG CGG GGC CGG  
GGC GCG CGG GGG CGG AGC TGG GGG CTC TTC TGT CAG CCA TGG GGC GGA GAA TGG GCG  
GAA CTG

5'- CAG TTC CGC CCA TTC TCC GCC CCA TGG CTG ACA GAA GAG CCC CCA GCT CCG CCC  
CCG CGC GCC CCG GCC CCG CCC CCG GAA GAG CGC AGA GGC CGA GGC CGC CTC GGC CTC  
TGA GCT

Insertion of the *NEIL3* PQS

5'- CAG TTC CGC CCA TTC TCC GCC CCA TGG CTG ACG CTC TTC TAG GGT GCT GTT TGG GCG  
GGG CCT GGG CGG GGC CGC TCT TCT GCA GAG GCC GAG GCC GCC TCG GCC TCT GAG CT

5'- AGC TCA GAG GCC GAG GCG GCC TCG GCC TCT GCA GAA GAG CGG CCC CGC CCA GGC  
CCC GCC CAA ACA GCA CCC TAG AAG AGC GTC AGC CAT GGG GCG GAG AAT GGG CGG AAC  
TG

Sequencing Primer

5'- TTT TTC ATG CAT CTC AAT  
TAG TCA GCA ACC ATA GT

**Cell Studies.** All cells were grown in Dulbecco's Modified Eagle Medium (DMEM) supplemented with 10% fetal bovine serum (FBS), 20 µg/mL gentamicin, 1x glutamax, and 1x non-essential amino acids. The cells were grown at 37 °C with 5% CO<sub>2</sub> at ~80% relative humidity and were split when they reached 70-80% confluence. The wild-type glioblastoma cells (U87 MG) were purchased from ATCC.

The transfection experiments were conducted in white, 96-well plates by seeding 2 x 10<sup>4</sup> cells per well and then allowing them to grow for 24 h. After 24 h, the cells were transfected with 200-400 ng of plasmid using X-tremeGene HP DNA transfection agent (Roch) following the manufacturer's protocol in Opti-MEM media. All transfection experiments were conducted at least 4 times. Next, 48 h post transfection, the Dual-Glo luciferase (Promega) assay was conducted following the manufacturer's protocol.

The data were analyzed by converting the luminescence measured into normalized relative response ratios (RRR), which is the luminescence of Rluc divided by the luminescence of luc (i.e., RRR = Rluc/luc). To obtain the normalized expression values reported, each RRR was divided by the RRR for the wild type sequence in that data set, for example, normalized expression = RRR<sub>OG12</sub>/RRR<sub>WT</sub>. The error bars represent 95% confidence intervals obtained from the data.

**Table S1.** PQSs in promoters and 5'-UTRs of human DNA repair genes

The sequences and their positions can be found on [acs.figshare.com](https://acs.figshare.com) at the following address.

<https://figshare.com/s/943e37d7549ad2b5960a>

**Table S2.** The 37 human DNA repair genes without a PQS in their promoters or 5'-UTRs.

ACTR5  
ASCC3  
ASF1A  
ATRX  
CDC5L  
CDC7  
CDK7  
DCLRE1B  
ERCC3  
ERCC5  
ERCC6L2  
EYA1  
FANCL  
GTF2H2  
GTF2H3  
HELQ  
KLHL15  
MSH4  
PARG  
PMS2  
POLG2  
POLI  
POLQ  
RAD51AP1  
RAD54B  
RFC3  
SFR1  
SPO11  
SWSAP1  
SYCP3  
TEX15  
TNP1  
UBE2T  
UBE2U  
UBE2V2  
XRCC2  
XRCC4

**Table S3.** PQSs in the promoters and 5'-UTRs of all human genes.

The sequences and their positions can be found on [acs.figshare.com](https://acs.figshare.com) at the following address.

<https://figshare.com/s/943e37d7549ad2b5960a>

**Table S4.** DNA Repair Promoter and 5'-UTR PQSs found in the BG4 G4 ChIP-Seq Data

(Balasubramanian's lab Nat. Genet. 2016, 48, 1267).

| Chr   | Start     | End       | Strand | Gene Symbol |
|-------|-----------|-----------|--------|-------------|
| chr1  | 2205272   | 2205358   | -      | FAAP20      |
| chr1  | 11262503  | 11262530  | -      | MTOR        |
| chr1  | 11681179  | 11681217  | -      | MAD2L2      |
| chr1  | 11681250  | 11681300  | +      | MAD2L2      |
| chr1  | 23019402  | 23019425  | +      | KDM1A       |
| chr1  | 28088745  | 28088788  | -      | EYA3        |
| chr1  | 45340134  | 45340173  | -      | MUTYH       |
| chr1  | 46247360  | 46247420  | -      | RAD54L      |
| chr1  | 46247476  | 46247560  | -      | RAD54L      |
| chr1  | 153728031 | 153728068 | -      | INTS3       |
| chr1  | 182839184 | 182839222 | -      | DHX9        |
| chr1  | 182839245 | 182839286 | -      | DHX9        |
| chr1  | 226408170 | 226408247 | +      | PARP1       |
| chr1  | 231338110 | 231338141 | -      | SPRTN       |
| chr10 | 67884566  | 67884623  | +      | SIRT1       |
| chr10 | 68527553  | 68527577  | +      | SLC25A16    |
| chr10 | 97498468  | 97498498  | +      | MMS19       |
| chr10 | 97498533  | 97498558  | +      | MMS19       |
| chr10 | 97498639  | 97498685  | +      | MMS19       |
| chr10 | 97498808  | 97498834  | +      | MMS19       |
| chr10 | 100912915 | 100912947 | -      | SLF2        |
| chr10 | 129467054 | 129467112 | -      | MGMT        |
| chr10 | 129467148 | 129467211 | -      | MGMT        |
| chr11 | 18322461  | 18322484  | +      | GTF2H1      |
| chr11 | 46121470  | 46121542  | -      | PHF21A      |
| chr11 | 46121585  | 46121685  | +      | PHF21A      |
| chr11 | 47214847  | 47214872  | -      | DDB2        |
| chr11 | 47214888  | 47214919  | -      | DDB2        |
| chr11 | 47214931  | 47214958  | +      | DDB2        |
| chr11 | 57311477  | 57311499  | -      | TNKS1BP1    |
| chr11 | 57311614  | 57311642  | -      | TNKS1BP1    |
| chr11 | 57311662  | 57311686  | -      | TNKS1BP1    |
| chr11 | 57322381  | 57322438  | -      | TNKS1BP1    |
| chr11 | 57322717  | 57322739  | +      | TNKS1BP1    |
| chr11 | 57324955  | 57324999  | -      | TNKS1BP1    |
| chr11 | 57324955  | 57324999  | -      | SSRP1       |
| chr11 | 61792691  | 61792742  | +      | FEN1        |

|       |           |           |   |         |
|-------|-----------|-----------|---|---------|
| chr11 | 63986529  | 63986566  | + | OTUB1   |
| chr11 | 63986583  | 63986614  | + | OTUB1   |
| chr11 | 63999396  | 63999423  | + | OTUB1   |
| chr11 | 63999442  | 63999477  | - | OTUB1   |
| chr11 | 63999551  | 63999585  | + | OTUB1   |
| chr11 | 63999604  | 63999637  | - | OTUB1   |
| chr11 | 65084238  | 65084268  | + | CDCA5   |
| chr11 | 65712294  | 65712326  | + | KAT5    |
| chr11 | 67118964  | 67119007  | + | KDM2A   |
| chr11 | 67119168  | 67119193  | + | KDM2A   |
| chr11 | 67239872  | 67239893  | + | KDM2A   |
| chr11 | 67248818  | 67248844  | - | KDM2A   |
| chr11 | 67353705  | 67353749  | + | POLD4   |
| chr11 | 67354857  | 67354891  | + | POLD4   |
| chr11 | 67374216  | 67374248  | - | RAD9A   |
| chr11 | 67391936  | 67391980  | + | RAD9A   |
| chr11 | 69675251  | 69675283  | - | ORAOV1  |
| chr11 | 73598112  | 73598148  | + | FAM168A |
| chr11 | 73598161  | 73598195  | + | FAM168A |
| chr11 | 73598522  | 73598555  | - | FAM168A |
| chr11 | 73598619  | 73598663  | - | FAM168A |
| chr11 | 74592551  | 74592578  | + | POLD3   |
| chr11 | 108222773 | 108222823 | + | ATM     |
| chr11 | 113875573 | 113875615 | - | USP28   |
| chr11 | 119121430 | 119121478 | - | HINFP   |
| chr11 | 125626298 | 125626328 | + | CHEK1   |
| chr12 | 991028    | 991082    | - | RAD52   |
| chr12 | 4321062   | 4321122   | - | TIGAR   |
| chr12 | 54188985  | 54189008  | - | SMUG1   |
| chr12 | 55966679  | 55966712  | + | CDK2    |
| chr12 | 55966751  | 55966790  | + | CDK2    |
| chr12 | 56221858  | 56221887  | + | NABP2   |
| chr12 | 56224252  | 56224289  | + | NABP2   |
| chr12 | 65824118  | 65824164  | - | HMGA2   |
| chr12 | 65824170  | 65824210  | + | HMGA2   |
| chr12 | 66302343  | 66302423  | - | HELB    |
| chr12 | 93442036  | 93442061  | + | UBE2N   |
| chr12 | 93442064  | 93442102  | - | UBE2N   |
| chr12 | 93442140  | 93442181  | + | UBE2N   |
| chr12 | 103965593 | 103965633 | - | TDG     |
| chr12 | 109098076 | 109098102 | + | UNG     |
| chr12 | 109098129 | 109098179 | + | UNG     |
| chr12 | 110501955 | 110502010 | - | RAD9B   |



|       |           |           |   |         |
|-------|-----------|-----------|---|---------|
| chr12 | 118372969 | 118372996 | - | TAOK3   |
| chr12 | 118373134 | 118373157 | + | TAOK3   |
| chr12 | 132687526 | 132687564 | + | POLE    |
| chr13 | 32586309  | 32586347  | + | PDS5B   |
| chr13 | 32586484  | 32586513  | + | PDS5B   |
| chr14 | 20262885  | 20262907  | + | TTC5    |
| chr14 | 64503828  | 64503855  | + | ZBTB1   |
| chr14 | 64503887  | 64503902  | - | ZBTB1   |
| chr14 | 64504126  | 64504178  | + | ZBTB1   |
| chr14 | 64505243  | 64505274  | + | ZBTB1   |
| chr14 | 89955839  | 89955867  | + | TDP1    |
| chr14 | 100238662 | 100238687 | - | YY1     |
| chr14 | 100240172 | 100240213 | + | YY1     |
| chr14 | 100240309 | 100240338 | + | YY1     |
| chr14 | 102592206 | 102592309 | + | RCOR1   |
| chr14 | 102592422 | 102592462 | - | RCOR1   |
| chr14 | 102592574 | 102592621 | - | RCOR1   |
| chr14 | 103715301 | 103715406 | - | XRCC3   |
| chr14 | 103715764 | 103715813 | + | XRCC3   |
| chr15 | 30903911  | 30903940  | + | FAN1    |
| chr15 | 40695141  | 40695173  | + | RAD51   |
| chr15 | 43510705  | 43510739  | - | TP53BP1 |
| chr15 | 43510772  | 43510799  | + | TP53BP1 |
| chr15 | 63504297  | 63504331  | - | USP3    |
| chr15 | 63504408  | 63504464  | + | USP3    |
| chr15 | 78872791  | 78872827  | + | MORF4L1 |
| chr15 | 78873547  | 78873575  | + | MORF4L1 |
| chr15 | 89334815  | 89334849  | - | POLG    |
| chr15 | 89334914  | 89334942  | + | POLG    |
| chr16 | 78159     | 78199     | - | MPG     |
| chr16 | 1782529   | 1782555   | - | EME2    |
| chr16 | 1782636   | 1782658   | + | EME2    |
| chr16 | 8963956   | 8964020   | + | USP7    |
| chr16 | 27268661  | 27268726  | - | NSMCE1  |
| chr16 | 29790697  | 29790753  | + | KIF22   |
| chr16 | 29805401  | 29805445  | + | KIF22   |
| chr16 | 29805619  | 29805665  | - | KIF22   |
| chr16 | 29805826  | 29805861  | + | KIF22   |
| chr16 | 29805866  | 29805913  | - | KIF22   |
| chr16 | 29806015  | 29806080  | - | KIF22   |
| chr16 | 29806127  | 29806153  | - | KIF22   |
| chr16 | 29806189  | 29806269  | - | KIF22   |
| chr16 | 29806286  | 29806322  | - | KIF22   |

|       |          |          |   |        |
|-------|----------|----------|---|--------|
| chr16 | 29996130 | 29996171 | - | INO80E |
| chr16 | 53703765 | 53703792 | - | FTO    |
| chr16 | 85689247 | 85689284 | - | GINS2  |
| chr17 | 1829779  | 1829814  | - | RPA1   |
| chr17 | 1829890  | 1829914  | + | RPA1   |
| chr17 | 29390330 | 29390376 | + | TAOK1  |
| chr17 | 29390389 | 29390413 | + | TAOK1  |
| chr17 | 35119813 | 35119833 | - | RAD51D |
| chr17 | 61863483 | 61863561 | - | BRIP1  |
| chr17 | 65561687 | 65561723 | - | AXIN2  |
| chr17 | 79797098 | 79797140 | - | CBX8   |
| chr17 | 79797156 | 79797191 | - | CBX8   |
| chr18 | 22933341 | 22933361 | + | RBBP8  |
| chr18 | 32091787 | 32091818 | + | RNF138 |
| chr18 | 32092366 | 32092403 | + | RNF138 |
| chr18 | 32092461 | 32092490 | + | RNF138 |
| chr18 | 32092508 | 32092547 | - | RNF138 |
| chr18 | 32092615 | 32092642 | - | RNF138 |
| chr18 | 32092687 | 32092715 | + | RNF138 |
| chr18 | 35498085 | 35498115 | + | INO80C |
| chr19 | 1354732  | 1354763  | + | MUM1   |
| chr19 | 2163676  | 2163746  | + | DOT1L  |
| chr19 | 2163679  | 2163707  | - | DOT1L  |
| chr19 | 2163789  | 2163862  | + | DOT1L  |
| chr19 | 4909870  | 4909900  | + | UHRF1  |
| chr19 | 4909972  | 4910005  | - | UHRF1  |
| chr19 | 4910005  | 4910051  | + | UHRF1  |
| chr19 | 4910168  | 4910234  | + | UHRF1  |
| chr19 | 32971944 | 32971971 | - | FAAP24 |
| chr19 | 38388065 | 38388118 | - | GGN    |
| chr19 | 38388335 | 38388357 | - | GGN    |
| chr19 | 45424381 | 45424435 | + | ERCC1  |
| chr19 | 45450883 | 45450911 | - | ERCC1  |
| chr19 | 45451043 | 45451070 | + | ERCC1  |
| chr19 | 48169744 | 48169793 | - | LIG1   |
| chr19 | 48169807 | 48169866 | - | LIG1   |
| chr19 | 48170346 | 48170384 | + | LIG1   |
| chr19 | 48170441 | 48170473 | + | LIG1   |
| chr19 | 48170610 | 48170687 | + | LIG1   |
| chr19 | 49869284 | 49869356 | + | PNKP   |
| chr19 | 49869767 | 49869803 | + | PNKP   |
| chr19 | 50384134 | 50384181 | + | POLD1  |
| chr19 | 58544261 | 58544287 | - | TRIM28 |

|       |           |           |   |         |
|-------|-----------|-----------|---|---------|
| chr2  | 17754049  | 17754096  | + | SMC6    |
| chr2  | 17754049  | 17754096  | + | GEN1    |
| chr2  | 47403105  | 47403151  | + | MSH2    |
| chr2  | 68467283  | 68467305  | - | APLF    |
| chr2  | 68467440  | 68467479  | + | APLF    |
| chr2  | 74958909  | 74959007  | + | POLE4   |
| chr2  | 99490199  | 99490218  | - | REV1    |
| chr2  | 135531454 | 135531483 | + | ZRANB3  |
| chr2  | 135531566 | 135531590 | - | ZRANB3  |
| chr2  | 151409772 | 151409805 | + | RIF1    |
| chr2  | 191677889 | 191677921 | + | NABP1   |
| chr2  | 191677971 | 191678012 | + | NABP1   |
| chr2  | 191678013 | 191678037 | - | NABP1   |
| chr2  | 191678088 | 191678108 | + | NABP1   |
| chr2  | 214809683 | 214809730 | + | BARD1   |
| chr2  | 214809757 | 214809783 | + | BARD1   |
| chr2  | 214809809 | 214809830 | + | BARD1   |
| chr2  | 214809979 | 214810018 | + | BARD1   |
| chr2  | 214810050 | 214810083 | + | BARD1   |
| chr2  | 219160874 | 219160896 | + | NHEJ1   |
| chr20 | 1225660   | 1226027   | - | RAD21L1 |
| chr20 | 5126724   | 5126754   | - | PCNA    |
| chr20 | 5126835   | 5126866   | + | PCNA    |
| chr20 | 5126911   | 5126954   | + | PCNA    |
| chr20 | 5126986   | 5127010   | + | PCNA    |
| chr20 | 50113088  | 50113114  | - | UBE2V1  |
| chr21 | 31659535  | 31659578  | - | SOD1    |
| chr21 | 39349225  | 39349293  | - | HMGN1   |
| chr22 | 28741972  | 28742012  | - | CHEK2   |
| chr22 | 28742102  | 28742153  | + | CHEK2   |
| chr22 | 28742542  | 28742570  | + | CHEK2   |
| chr22 | 28742590  | 28742646  | + | CHEK2   |
| chr22 | 28742678  | 28742703  | + | CHEK2   |
| chr22 | 38570195  | 38570258  | + | DMC1    |
| chr22 | 38570272  | 38570401  | + | DMC1    |
| chr22 | 38570433  | 38570472  | + | DMC1    |
| chr22 | 41621125  | 41621168  | + | XRCC6   |
| chr3  | 14124778  | 14124811  | - | CHCHD4  |
| chr3  | 25665035  | 25665070  | + | TOP2B   |
| chr3  | 122564380 | 122564413 | - | PARP9   |
| chr3  | 122564380 | 122564413 | - | DTX3L   |
| chr3  | 129440449 | 129440482 | + | MBD4    |
| chr3  | 131026837 | 131026871 | - | ASTE1   |

|      |           |           |   |         |
|------|-----------|-----------|---|---------|
| chr3 | 131381536 | 131381561 | - | NUDT16  |
| chr3 | 131381595 | 131381629 | - | NUDT16  |
| chr3 | 142578877 | 142578921 | + | ATR     |
| chr3 | 196503826 | 196503858 | + | RNF168  |
| chr3 | 196503869 | 196503884 | - | RNF168  |
| chr4 | 1346801   | 1346841   | - | UVSSA   |
| chr4 | 2242295   | 2242462   | + | POLN    |
| chr4 | 102827904 | 102827932 | - | UBE2D3  |
| chr4 | 102868948 | 102868977 | - | UBE2D3  |
| chr4 | 143513334 | 143513364 | - | SMARCA5 |
| chr4 | 143513387 | 143513410 | + | SMARCA5 |
| chr4 | 184649488 | 184649518 | - | PRIMPOL |
| chr4 | 184649538 | 184649722 | - | PRIMPOL |
| chr5 | 55233838  | 55233874  | + | CCNO    |
| chr5 | 69369693  | 69369724  | + | RAD17   |
| chr5 | 75511619  | 75511707  | - | POLK    |
| chr5 | 80655060  | 80655131  | + | MSH3    |
| chr5 | 134370963 | 134370986 | - | UBE2B   |
| chr5 | 134371143 | 134371198 | - | UBE2B   |
| chr6 | 2765182   | 2765210   | - | WRNIP1  |
| chr6 | 18264581  | 18264675  | + | DEK     |
| chr6 | 18264748  | 18264798  | + | DEK     |
| chr6 | 24666828  | 24666854  | - | TDP2    |
| chr6 | 30717155  | 30717184  | - | MDC1    |
| chr6 | 30717517  | 30717552  | - | MDC1    |
| chr6 | 30914357  | 30914420  | + | GTF2H4  |
| chr6 | 31739660  | 31739694  | - | MSH5    |
| chr6 | 31814602  | 31814670  | - | HSPA1A  |
| chr6 | 31815149  | 31815176  | - | HSPA1A  |
| chr6 | 31815189  | 31815228  | - | HSPA1A  |
| chr6 | 34235917  | 34235955  | - | HMGA1   |
| chr6 | 43576106  | 43576129  | + | POLH    |
| chr6 | 118935173 | 118935243 | + | MCM9    |
| chr6 | 158168258 | 158168293 | - | GTF2H5  |
| chr7 | 2242299   | 2242322   | + | NUDT1   |
| chr7 | 36152767  | 36152887  | - | EEPD1   |
| chr7 | 36153046  | 36153089  | - | EEPD1   |
| chr7 | 36153134  | 36153176  | - | EEPD1   |
| chr7 | 44082526  | 44082541  | + | POLM    |
| chr7 | 44082765  | 44082891  | + | POLM    |
| chr7 | 44123474  | 44123504  | - | POLD2   |
| chr7 | 44123527  | 44123557  | - | POLD2   |
| chr7 | 44123837  | 44123891  | - | POLD2   |

|      |           |           |   |        |
|------|-----------|-----------|---|--------|
| chr7 | 44123921  | 44123956  | - | POLD2  |
| chr7 | 47979266  | 47979317  | - | HUS1   |
| chr7 | 47979333  | 47979382  | - | HUS1   |
| chr7 | 50450439  | 50450468  | + | FIGNL1 |
| chr7 | 55018793  | 55018825  | - | EGFR   |
| chr7 | 55018969  | 55019007  | - | EGFR   |
| chr7 | 73522749  | 73522806  | + | BAZ1B  |
| chr7 | 101154381 | 101154432 | + | AP1S1  |
| chr8 | 27772753  | 27772784  | + | ESCO2  |
| chr8 | 27774432  | 27774450  | + | ESCO2  |
| chr8 | 31033468  | 31033534  | + | WRN    |
| chr8 | 31033665  | 31033696  | + | WRN    |
| chr8 | 31033722  | 31033790  | + | WRN    |
| chr8 | 42338410  | 42338437  | - | POLB   |
| chr8 | 47960136  | 47960183  | - | PRKDC  |
| chr8 | 73878896  | 73878958  | + | UBE2W  |
| chr8 | 73878973  | 73879011  | + | UBE2W  |
| chr8 | 89984242  | 89984281  | + | NBN    |
| chr8 | 102239058 | 102239087 | - | RRM2B  |
| chr8 | 102239567 | 102239616 | - | RRM2B  |
| chr8 | 102412741 | 102412792 | + | UBR5   |
| chr8 | 102412988 | 102413012 | + | UBR5   |
| chr8 | 116874876 | 116874897 | - | RAD21  |
| chr8 | 144291346 | 144291375 | - | HSF1   |
| chr8 | 144291444 | 144291463 | - | HSF1   |
| chr8 | 144291470 | 144291491 | + | HSF1   |
| chr8 | 144291515 | 144291542 | + | HSF1   |
| chr8 | 144428429 | 144428482 | - | TONSL  |
| chr8 | 144428630 | 144428657 | - | TONSL  |
| chr8 | 144428722 | 144428744 | - | TONSL  |
| chr8 | 144517879 | 144517908 | + | RECQL4 |
| chr8 | 144518034 | 144518077 | + | RECQL4 |
| chr9 | 33025142  | 33025172  | - | APTX   |
| chr9 | 33025205  | 33025237  | + | APTX   |
| chr9 | 70258881  | 70258898  | + | SMC5   |
| chr9 | 95317012  | 95317044  | + | FANCC  |
| chr9 | 95317224  | 95317285  | - | FANCC  |
| chr9 | 95317770  | 95317802  | + | FANCC  |
| chr9 | 97697428  | 97697470  | + | XPA    |
| chr9 | 107282814 | 107282862 | - | RAD23B |
| chr9 | 107283222 | 107283243 | - | RAD23B |
| chr9 | 112718129 | 112718180 | - | INIP   |
| chr9 | 112718281 | 112718348 | + | INIP   |

|      |           |           |   |       |
|------|-----------|-----------|---|-------|
| chr9 | 113410539 | 113410567 | - | POLE3 |
| chr9 | 127785049 | 127785095 | - | CDK9  |
| chr9 | 127785589 | 127785624 | - | CDK9  |
| chr9 | 127785666 | 127785693 | - | CDK9  |
| chr9 | 127785969 | 127786007 | + | CDK9  |
| chr9 | 128275943 | 128275970 | + | SWI5  |
| chr9 | 128276221 | 128276251 | + | SWI5  |
| chr9 | 132355255 | 132355285 | + | SETX  |
| chrX | 14873248  | 14873283  | + | FANCB |
| chrX | 24693627  | 24693658  | - | POLA1 |
| chrX | 71283351  | 71283405  | - | NONO  |
| chrX | 152830649 | 152830684 | + | CETN2 |
| chrX | 152830771 | 152830803 | - | CETN2 |
| chrX | 152831023 | 152831052 | + | CETN2 |
| chrX | 153470637 | 153470683 | - | TREX2 |
| chrX | 153470710 | 153470744 | - | TREX2 |
| chrX | 153470766 | 153470896 | + | TREX2 |
| chrX | 155071053 | 155071096 | + | BRCC3 |
| chrX | 155071148 | 155071196 | - | BRCC3 |
| chrX | 155071281 | 155071311 | - | BRCC3 |
| chrX | 155071327 | 155071405 | - | BRCC3 |

**Table S5.** DNA Repair Promoter and 5'-UTR PQSs found in the XPB/XPD ChIP-Seq Data (Maizel's lab Nat. Chem. Biol. 2014, 10, 313).

| Chr   | Start    | End      | Strand | Gene Symbol |
|-------|----------|----------|--------|-------------|
| chr1  | 2212739  | 2212779  | +      | FAAP20      |
| chr1  | 11681688 | 11681714 | -      | MAD2L2      |
| chr1  | 11692679 | 11692734 | -      | MAD2L2      |
| chr1  | 11692947 | 11692965 | +      | MAD2L2      |
| chr1  | 11692978 | 11693000 | +      | MAD2L2      |
| chr1  | 23019402 | 23019425 | +      | KDM1A       |
| chr1  | 27915164 | 27915192 | -      | RPA2        |
| chr1  | 28088745 | 28088788 | -      | EYA3        |
| chr1  | 45340134 | 45340173 | -      | MUTYH       |
| chr1  | 62435971 | 62435997 | +      | USP1        |
| chr1  | 2.31E+08 | 2.31E+08 | -      | SPRTN       |
| chr1  | 2.42E+08 | 2.42E+08 | +      | EXO1        |
| chr10 | 49539841 | 49539873 | +      | ERCC6       |
| chr10 | 60778568 | 60778625 | +      | CDK1        |
| chr10 | 60778672 | 60778731 | +      | CDK1        |
| chr10 | 97499549 | 97499585 | +      | MMS19       |
| chr10 | 97500336 | 97500384 | +      | MMS19       |
| chr10 | 1.11E+08 | 1.11E+08 | +      | SMC3        |
| chr11 | 6402857  | 6402886  | +      | APBB1       |
| chr11 | 6403381  | 6403416  | +      | APBB1       |
| chr11 | 18322461 | 18322484 | +      | GTF2H1      |
| chr11 | 43880471 | 43880512 | -      | ALKBH3      |
| chr11 | 43880608 | 43880648 | -      | ALKBH3      |
| chr11 | 47214847 | 47214872 | -      | DDB2        |
| chr11 | 47214888 | 47214919 | -      | DDB2        |
| chr11 | 47214931 | 47214958 | +      | DDB2        |
| chr11 | 57304109 | 57304134 | -      | TNKS1BP1    |
| chr11 | 57323563 | 57323590 | -      | TNKS1BP1    |
| chr11 | 61333353 | 61333396 | -      | DDB1        |
| chr11 | 61792408 | 61792431 | -      | FEN1        |
| chr11 | 61792691 | 61792742 | +      | FEN1        |
| chr11 | 65712294 | 65712326 | +      | KAT5        |
| chr11 | 65859918 | 65859954 | -      | MUS81       |
| chr11 | 65860163 | 65860193 | -      | MUS81       |
| chr11 | 65860635 | 65860666 | -      | MUS81       |
| chr11 | 67239872 | 67239893 | +      | KDM2A       |
| chr11 | 67317458 | 67317502 | -      | RAD9A       |

|       |          |          |   |         |
|-------|----------|----------|---|---------|
| chr11 | 67354857 | 67354891 | + | POLD4   |
| chr11 | 67355440 | 67355464 | + | POLD4   |
| chr11 | 67355468 | 67355498 | - | POLD4   |
| chr11 | 67357225 | 67357266 | - | POLD4   |
| chr11 | 67374216 | 67374248 | - | RAD9A   |
| chr11 | 67374701 | 67374734 | + | RAD9A   |
| chr11 | 67374744 | 67374771 | - | RAD9A   |
| chr11 | 69670101 | 69670150 | + | ORAOV1  |
| chr11 | 73598522 | 73598555 | - | FAM168A |
| chr11 | 73598619 | 73598663 | - | FAM168A |
| chr11 | 75404880 | 75404909 | + | RPS3    |
| chr11 | 1.14E+08 | 1.14E+08 | - | USP28   |
| chr11 | 1.26E+08 | 1.26E+08 | + | CHEK1   |
| chr11 | 1.26E+08 | 1.26E+08 | - | CHEK1   |
| chr12 | 2877326  | 2877391  | + | FOXM1   |
| chr12 | 56221135 | 56221163 | - | NABP2   |
| chr12 | 56221273 | 56221299 | + | NABP2   |
| chr12 | 56221388 | 56221452 | - | NABP2   |
| chr12 | 56221858 | 56221887 | + | NABP2   |
| chr12 | 56222284 | 56222336 | - | NABP2   |
| chr12 | 65824170 | 65824210 | + | HMGA2   |
| chr12 | 65824636 | 65824664 | - | HMGA2   |
| chr12 | 65824873 | 65824903 | - | HMGA2   |
| chr12 | 66302343 | 66302423 | - | HELB    |
| chr12 | 1.02E+08 | 1.02E+08 | - | PARPBP  |
| chr12 | 1.04E+08 | 1.04E+08 | - | TDG     |
| chr12 | 1.18E+08 | 1.18E+08 | - | TAOK3   |
| chr12 | 1.18E+08 | 1.18E+08 | + | TAOK3   |
| chr13 | 30618153 | 30618182 | + | HMGB1   |
| chr14 | 20457954 | 20457990 | + | APEX1   |
| chr14 | 20458194 | 20458224 | - | APEX1   |
| chr14 | 1.03E+08 | 1.03E+08 | - | RCOR1   |
| chr15 | 40694830 | 40694864 | - | RAD51   |
| chr15 | 40695141 | 40695173 | + | RAD51   |
| chr15 | 40695329 | 40695356 | + | RAD51   |
| chr15 | 63157494 | 63157529 | + | RPS27L  |
| chr15 | 63157561 | 63157613 | + | RPS27L  |
| chr15 | 63503564 | 63503604 | - | USP3    |
| chr15 | 63504066 | 63504125 | - | USP3    |
| chr15 | 63504297 | 63504331 | - | USP3    |
| chr15 | 63504408 | 63504464 | + | USP3    |
| chr15 | 74043808 | 74043839 | + | PML     |
| chr15 | 89334914 | 89334942 | + | POLG    |



|       |          |          |   |         |
|-------|----------|----------|---|---------|
| chr16 | 23641657 | 23641691 | - | PALB2   |
| chr16 | 27268547 | 27268608 | - | NSMCE1  |
| chr16 | 27268661 | 27268726 | - | NSMCE1  |
| chr16 | 29790697 | 29790753 | + | KIF22   |
| chr16 | 29814471 | 29814516 | + | PAGR1   |
| chr16 | 29814587 | 29814623 | - | PAGR1   |
| chr16 | 29814691 | 29814741 | - | PAGR1   |
| chr16 | 29815239 | 29815267 | + | PAGR1   |
| chr16 | 29815358 | 29815386 | + | PAGR1   |
| chr16 | 30075483 | 30075513 | + | PPP4C   |
| chr16 | 30076134 | 30076167 | + | PPP4C   |
| chr16 | 70523293 | 70523334 | - | SF3B3   |
| chr16 | 89921476 | 89921514 | + | MC1R    |
| chr17 | 28335928 | 28335963 | + | TNFAIP1 |
| chr17 | 58691874 | 58691907 | - | RAD51C  |
| chr17 | 58692004 | 58692042 | + | RAD51C  |
| chr17 | 58692125 | 58692162 | + | RAD51C  |
| chr17 | 75634227 | 75634254 | + | RECQL5  |
| chr17 | 75634383 | 75634412 | + | RECQL5  |
| chr17 | 81552623 | 81552648 | + | FAAP100 |
| chr17 | 81552939 | 81552979 | + | FAAP100 |
| chr17 | 81553173 | 81553195 | - | FAAP100 |
| chr17 | 81553243 | 81553276 | + | FAAP100 |
| chr17 | 81554301 | 81554327 | + | FAAP100 |
| chr18 | 35478563 | 35478595 | - | INO80C  |
| chr18 | 35498085 | 35498115 | + | INO80C  |
| chr18 | 35498295 | 35498319 | - | INO80C  |
| chr19 | 4910339  | 4910408  | + | UHRF1   |
| chr19 | 7629196  | 7629227  | - | XAB2    |
| chr19 | 7629878  | 7629900  | + | XAB2    |
| chr19 | 7630016  | 7630078  | + | XAB2    |
| chr19 | 12949710 | 12949732 | + | RAD23A  |
| chr19 | 17267550 | 17267582 | - | BABAM1  |
| chr19 | 32971757 | 32971808 | - | FAAP24  |
| chr19 | 32971944 | 32971971 | - | FAAP24  |
| chr19 | 38388893 | 38388918 | - | GGN     |
| chr19 | 38389127 | 38389171 | - | GGN     |
| chr19 | 38389283 | 38389315 | - | GGN     |
| chr19 | 38389486 | 38389514 | + | GGN     |
| chr19 | 38389530 | 38389563 | - | GGN     |
| chr19 | 38389699 | 38389721 | - | GGN     |
| chr19 | 38389770 | 38389803 | + | GGN     |
| chr19 | 38389915 | 38390062 | + | GGN     |

|       |          |          |   |        |
|-------|----------|----------|---|--------|
| chr19 | 45406722 | 45406749 | + | ERCC1  |
| chr19 | 45422107 | 45422139 | - | ERCC1  |
| chr19 | 45424381 | 45424435 | + | ERCC1  |
| chr19 | 48999245 | 48999279 | + | RUVBL2 |
| chr19 | 49865100 | 49865147 | - | PNKP   |
| chr19 | 49865353 | 49865382 | - | PNKP   |
| chr19 | 50383119 | 50383154 | + | POLD1  |
| chr19 | 54115437 | 54115464 | - | TFPT   |
| chr19 | 54115808 | 54115849 | + | TFPT   |
| chr19 | 58547235 | 58547274 | - | TRIM28 |
| chr19 | 58547721 | 58547751 | + | TRIM28 |
| chr19 | 58548525 | 58548563 | - | TRIM28 |
| chr2  | 53970787 | 53970842 | - | PSME4  |
| chr2  | 1.01E+08 | 1.01E+08 | - | NPAS2  |
| chr2  | 1.51E+08 | 1.51E+08 | + | RIF1   |
| chr2  | 1.92E+08 | 1.92E+08 | + | NABP1  |
| chr2  | 1.92E+08 | 1.92E+08 | + | NABP1  |
| chr2  | 1.92E+08 | 1.92E+08 | + | NABP1  |
| chr2  | 1.92E+08 | 1.92E+08 | - | NABP1  |
| chr2  | 1.92E+08 | 1.92E+08 | + | NABP1  |
| chr2  | 1.92E+08 | 1.92E+08 | - | NABP1  |
| chr2  | 1.92E+08 | 1.92E+08 | - | NABP1  |
| chr20 | 50086237 | 50086286 | - | UBE2V1 |
| chr20 | 50113155 | 50113192 | - | UBE2V1 |
| chr20 | 63657835 | 63657877 | + | RTEL1  |
| chr20 | 63657920 | 63657956 | + | RTEL1  |
| chr20 | 63658105 | 63658138 | + | RTEL1  |
| chr21 | 31659535 | 31659578 | - | SOD1   |
| chr22 | 28741972 | 28742012 | - | CHEK2  |
| chr22 | 28742102 | 28742153 | + | CHEK2  |
| chr22 | 28742542 | 28742570 | + | CHEK2  |
| chr22 | 28742590 | 28742646 | + | CHEK2  |
| chr22 | 28742678 | 28742703 | + | CHEK2  |
| chr22 | 41621125 | 41621168 | + | XRCC6  |
| chr3  | 4303529  | 4303559  | + | SETMAR |
| chr3  | 9749339  | 9749372  | - | OGG1   |
| chr3  | 14124778 | 14124811 | - | CHCHD4 |
| chr3  | 14125234 | 14125268 | - | CHCHD4 |
| chr3  | 14125734 | 14125765 | + | CHCHD4 |
| chr3  | 14125992 | 14126031 | - | CHCHD4 |
| chr3  | 48465360 | 48465386 | + | TREX1  |
| chr3  | 48465919 | 48465965 | + | TREX1  |
| chr3  | 48466099 | 48466136 | + | TREX1  |

|      |          |          |   |         |
|------|----------|----------|---|---------|
| chr3 | 48466180 | 48466214 | + | TREX1   |
| chr3 | 51942882 | 51942925 | - | PARP3   |
| chr3 | 51943215 | 51943248 | + | PARP3   |
| chr3 | 51943271 | 51943306 | + | PARP3   |
| chr3 | 51943833 | 51943886 | - | PARP3   |
| chr3 | 51944040 | 51944086 | - | PARP3   |
| chr3 | 1.23E+08 | 1.23E+08 | - | DTX3L   |
| chr3 | 1.23E+08 | 1.23E+08 | + | DTX3L   |
| chr3 | 1.23E+08 | 1.23E+08 | - | DTX3L   |
| chr3 | 1.23E+08 | 1.23E+08 | + | PARP9   |
| chr3 | 1.23E+08 | 1.23E+08 | + | DTX3L   |
| chr3 | 1.23E+08 | 1.23E+08 | - | PARP9   |
| chr3 | 1.23E+08 | 1.23E+08 | - | DTX3L   |
| chr3 | 1.28E+08 | 1.28E+08 | - | RUVBL1  |
| chr3 | 1.28E+08 | 1.28E+08 | - | RUVBL1  |
| chr3 | 1.29E+08 | 1.29E+08 | + | MBD4    |
| chr3 | 1.31E+08 | 1.31E+08 | - | ASTE1   |
| chr3 | 1.31E+08 | 1.31E+08 | - | NUDT16  |
| chr3 | 1.31E+08 | 1.31E+08 | - | NUDT16  |
| chr3 | 1.87E+08 | 1.87E+08 | + | RFC4    |
| chr3 | 1.87E+08 | 1.87E+08 | + | RFC4    |
| chr4 | 1.03E+08 | 1.03E+08 | - | UBE2D3  |
| chr4 | 1.03E+08 | 1.03E+08 | - | UBE2D3  |
| chr4 | 1.03E+08 | 1.03E+08 | - | UBE2D3  |
| chr4 | 1.85E+08 | 1.85E+08 | - | PRIMPOL |
| chr5 | 892151   | 892184   | - | TRIP13  |
| chr5 | 892257   | 892295   | + | TRIP13  |
| chr5 | 892419   | 892495   | - | TRIP13  |
| chr5 | 892512   | 892575   | - | TRIP13  |
| chr5 | 34915334 | 34915363 | - | RAD1    |
| chr5 | 60945606 | 60945640 | - | ERCC8   |
| chr5 | 60945764 | 60945789 | + | ERCC8   |
| chr5 | 69369416 | 69369458 | - | RAD17   |
| chr5 | 69369577 | 69369647 | - | RAD17   |
| chr5 | 69369693 | 69369724 | + | RAD17   |
| chr5 | 69370030 | 69370047 | - | RAD17   |
| chr5 | 1.33E+08 | 1.33E+08 | - | RAD50   |
| chr5 | 1.34E+08 | 1.34E+08 | - | UBE2B   |
| chr5 | 1.34E+08 | 1.34E+08 | - | UBE2B   |
| chr5 | 1.34E+08 | 1.34E+08 | - | UBE2B   |
| chr6 | 30717155 | 30717184 | - | MDC1    |
| chr6 | 30717517 | 30717552 | - | MDC1    |
| chr6 | 30742265 | 30742297 | - | IER3    |

|      |          |          |   |       |
|------|----------|----------|---|-------|
| chr6 | 30742405 | 30742452 | - | IER3  |
| chr6 | 30742554 | 30742605 | + | IER3  |
| chr6 | 30742636 | 30742670 | - | IER3  |
| chr6 | 30742715 | 30742775 | - | IER3  |
| chr6 | 30743075 | 30743111 | + | IER3  |
| chr6 | 31739660 | 31739694 | - | MSH5  |
| chr6 | 31740327 | 31740351 | - | MSH5  |
| chr6 | 31740537 | 31740565 | - | MSH5  |
| chr6 | 34235632 | 34235655 | - | HMGA1 |
| chr6 | 34235717 | 34235761 | + | HMGA1 |
| chr6 | 34235917 | 34235955 | - | HMGA1 |
| chr6 | 34236462 | 34236504 | - | HMGA1 |
| chr6 | 34236701 | 34236744 | - | HMGA1 |
| chr6 | 1.11E+08 | 1.11E+08 | + | REV3L |
| chr6 | 1.11E+08 | 1.11E+08 | + | REV3L |
| chr7 | 2244767  | 2244792  | + | NUDT1 |
| chr7 | 4775368  | 4775393  | - | AP5Z1 |
| chr7 | 44072467 | 44072498 | + | POLM  |
| chr7 | 44072739 | 44072765 | - | POLM  |
| chr7 | 44073179 | 44073208 | + | POLM  |
| chr7 | 73522749 | 73522806 | + | BAZ1B |
| chr8 | 47960136 | 47960183 | - | PRKDC |
| chr8 | 1.02E+08 | 1.02E+08 | + | UBR5  |
| chr9 | 1.13E+08 | 1.13E+08 | - | POLE3 |

**Table S6.** Genes with PQSs common to the BG4 ChIP-Seq and XPB/XPD ChIP-Seq Data Sets.

ASTE1  
BAZ1B  
CHCHD4  
CHEK1  
CHEK2  
DDB2  
DTX3L  
ERCC1  
EYA3  
FAAP20  
FAAP24  
FAM168A  
FEN1  
GGN  
GTF2H1  
HELB  
HMGA1  
HMGA2  
INO80C  
KAT5  
KDM1A  
KDM2A  
KIF22  
MAD2L2  
MBD4  
MDC1  
MMS19  
MSH5  
MUTYH  
NABP1  
NABP2  
NSMCE1  
NUDT1  
NUDT16  
ORAOV1  
PARP9  
PNKP  
POLD1  
POLD4

POLE3  
POLG  
POLM  
PRIMPOL  
PRKDC  
RAD17  
RAD51  
RAD9A  
RCOR1  
RIF1  
SOD1  
SPRTN  
TAOK3  
TDG  
TNKS1BP1  
TRIM28  
UBE2B  
UBE2D3  
UBE2V1  
UBR5  
UHRF1  
USP28  
USP3  
XRCC6

**Figure S1.**  $^1\text{H-NMR}$ , CD, TDS,  $T_m$ , and ThT data for the 30 PQSs studied.

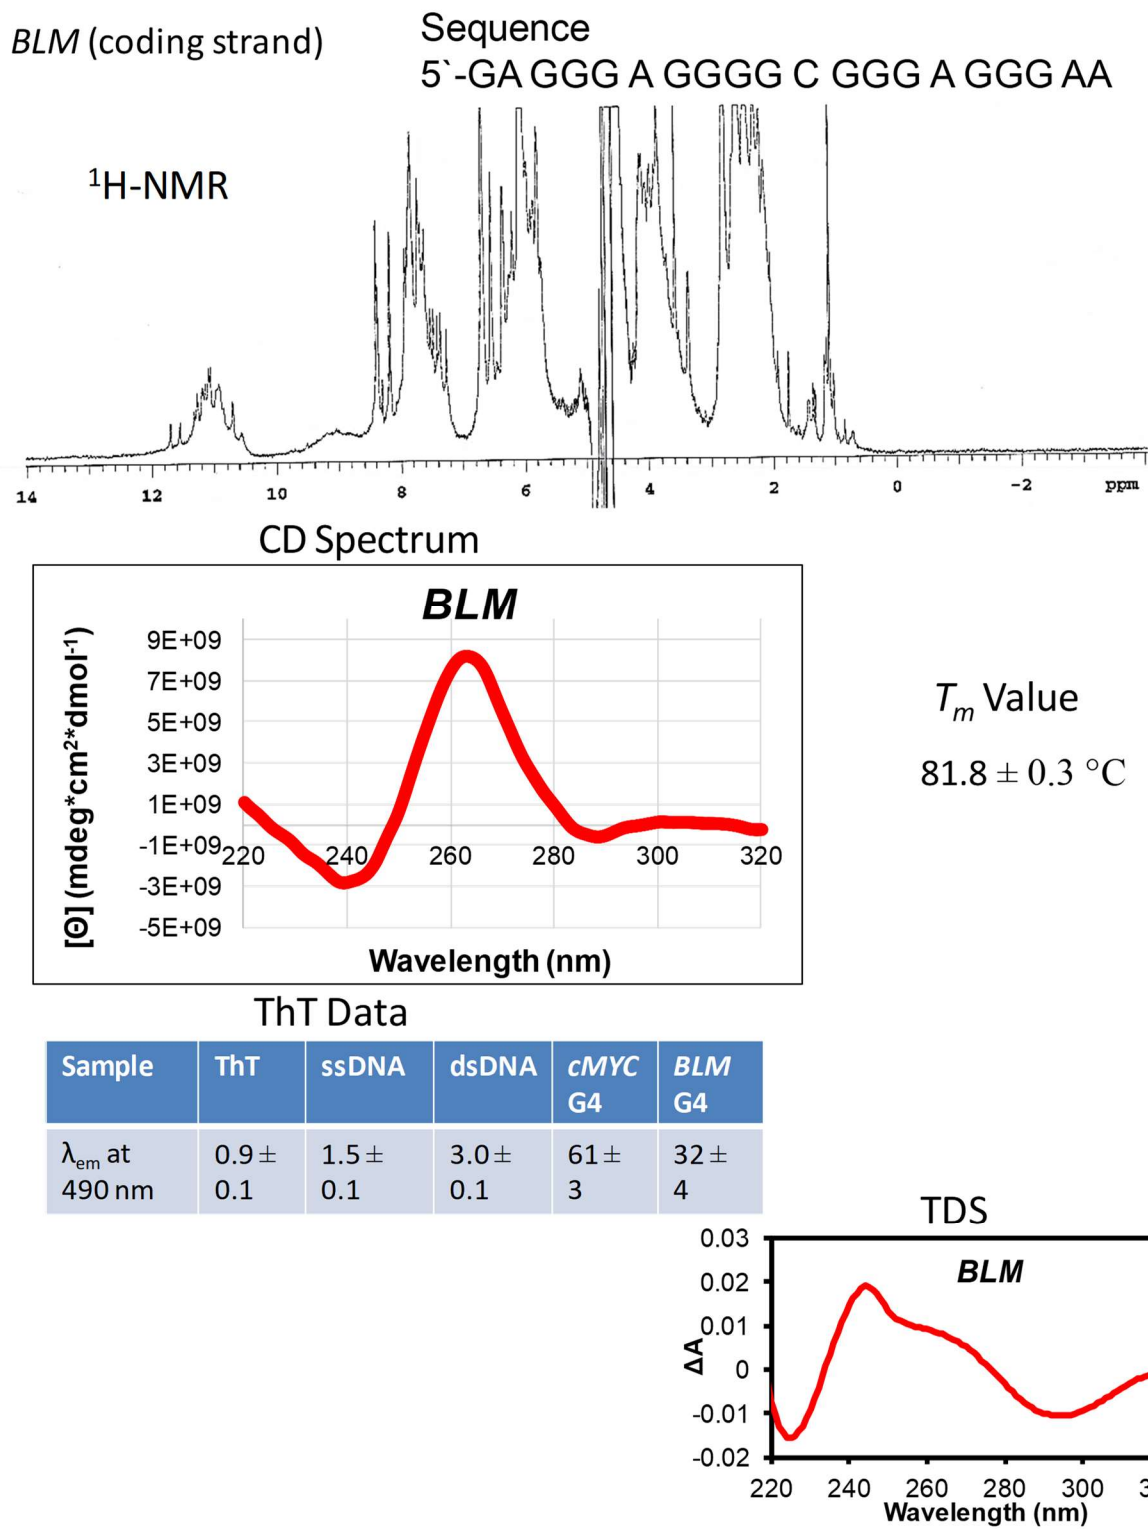

*ERCC8* Sequence  
 (template strand) 5`-AA GGG CTAGAA GGG CCA GGGG A GGGG TT

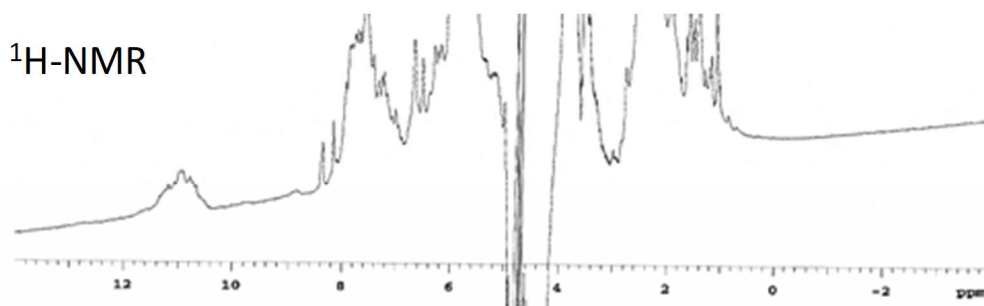

CD Spectrum

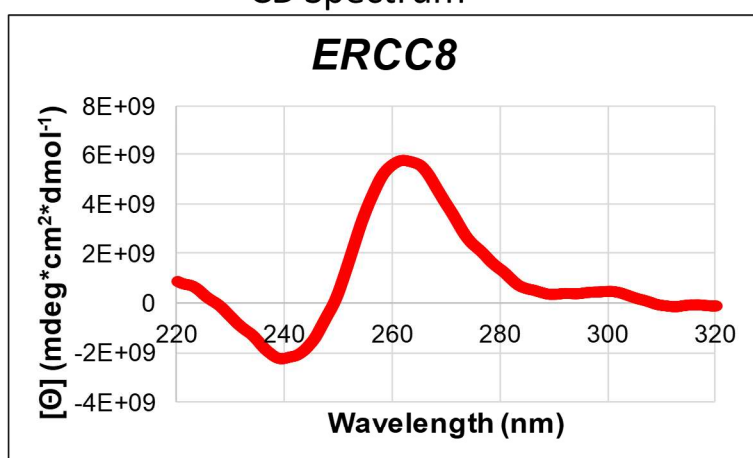

$T_m$  Value  
 $62.3 \pm 0.4$  °C

ThT Data

| Sequence                    | ThT           | ssDNA         | dsDNA         | <i>cMYC</i><br>G4 | <i>ERCC8</i><br>G4 |
|-----------------------------|---------------|---------------|---------------|-------------------|--------------------|
| $\lambda_{em}$ at<br>490 nm | $0.9 \pm 0.1$ | $1.5 \pm 0.1$ | $3.0 \pm 0.1$ | $61 \pm 3$        | $41 \pm 5$         |

TDS

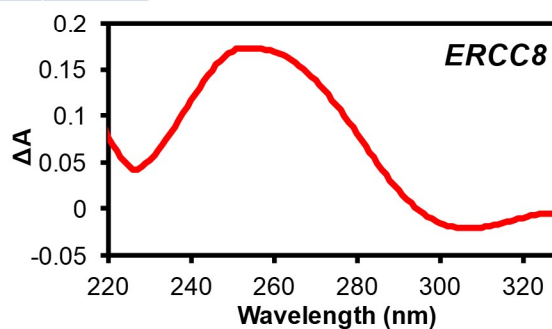



FAAP24  
(coding strand)

Sequence  
5`-GT GGGG CTCTGT GGGG CC GGG AATTA  
GGGG TA

<sup>1</sup>H-NMR

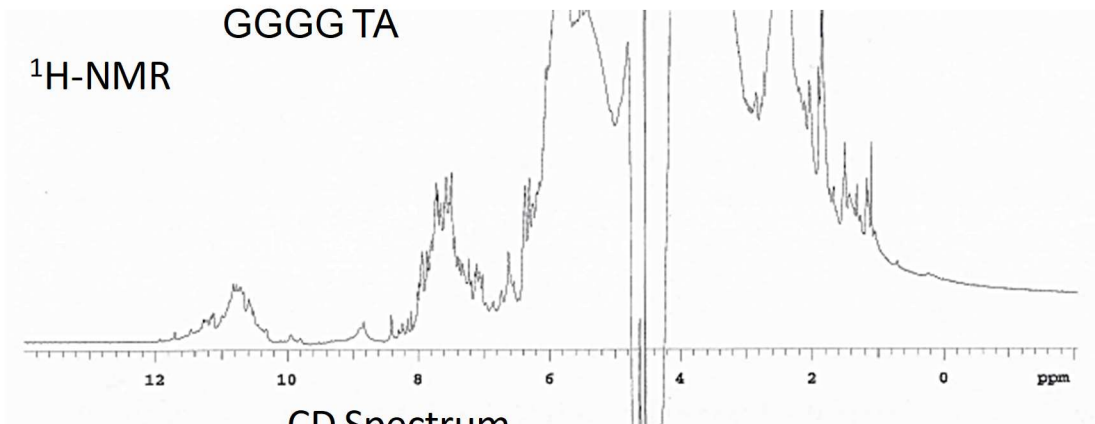

CD Spectrum

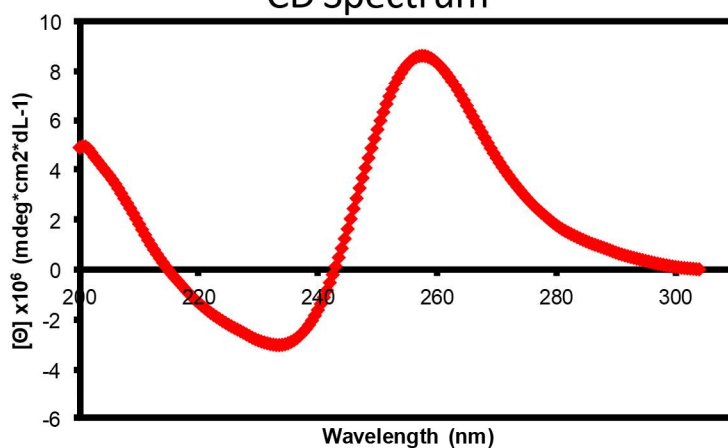

$T_m$  Value  
 $57.1 \pm 0.8$  °C

ThT Data

| Sequence                    | ThT           | ssDNA         | dsDNA         | <i>cMYC</i><br>G4 | <i>C19or</i><br><i>f40</i><br>G4 |
|-----------------------------|---------------|---------------|---------------|-------------------|----------------------------------|
| $\lambda_{em}$ at<br>490 nm | $0.9 \pm 0.1$ | $1.5 \pm 0.1$ | $3.0 \pm 0.1$ | $61 \pm 3$        | $53 \pm 2.2$                     |

TDS

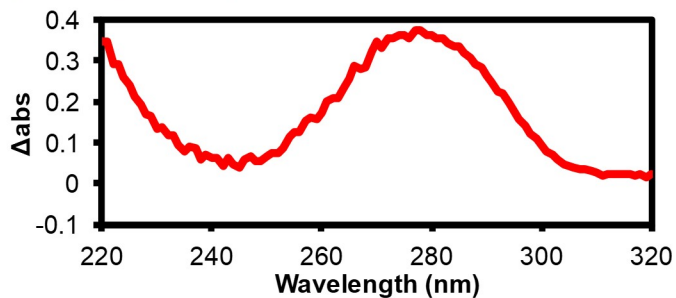

**FANCA** Sequence  
 (coding strand) 5`-GC GGG CTC GGG CGCA GGG AGCCGCCGCC  
 GGGG CT

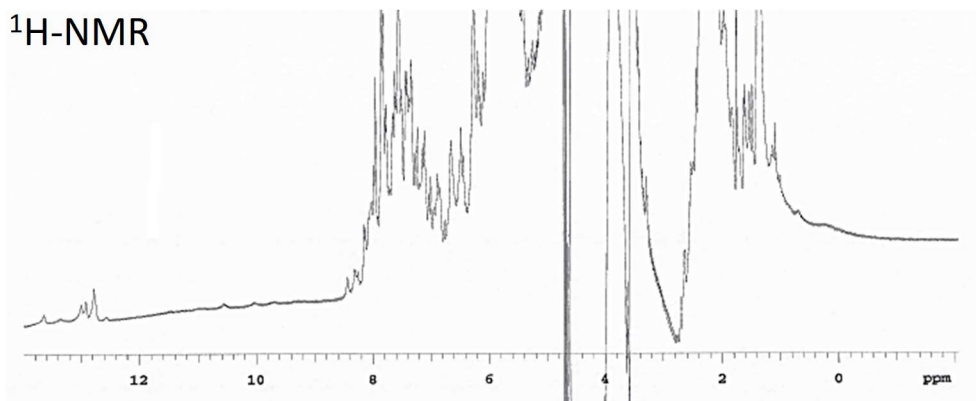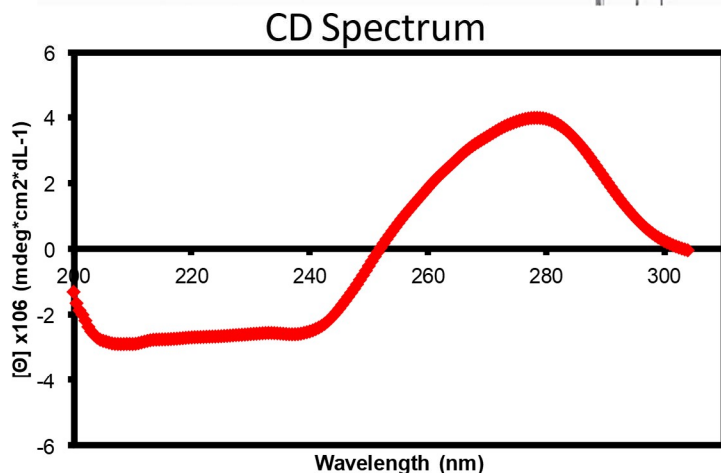

$T_m$  Value  
 A temperature-dependent transition was not observed when monitoring the Abs at 295 nm.

ThT Data

| Sequence                 | ThT       | ssDNA     | dsDNA     | cMYC G4 | FANCA A G4 |
|--------------------------|-----------|-----------|-----------|---------|------------|
| $\lambda_{em}$ at 490 nm | 0.9 ± 0.1 | 1.5 ± 0.1 | 3.0 ± 0.1 | 61 ± 3  | 15.9 ± 0.2 |

TDS

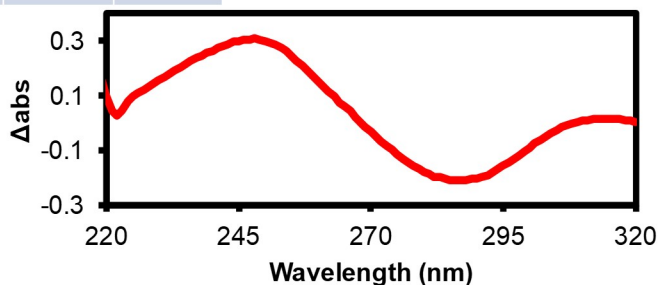

FANCC

Sequence

(template strand)

5'-TC GGG TCCGT GGGG C GGGG C GGG CG

<sup>1</sup>H-NMR

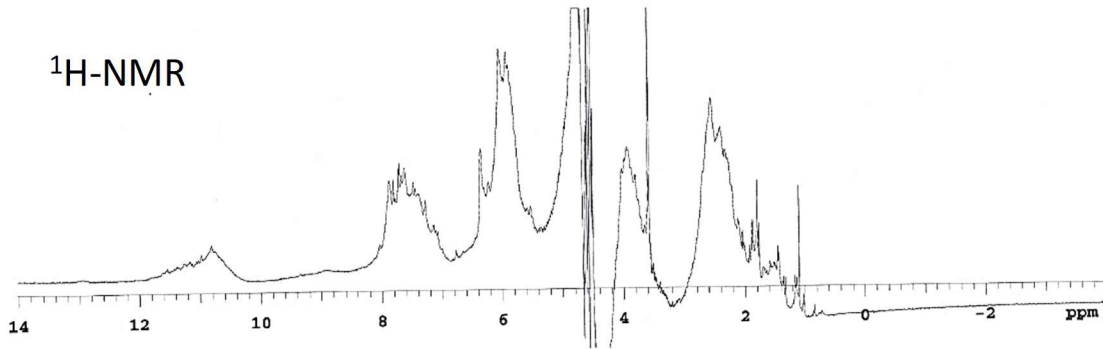

CD Spectrum

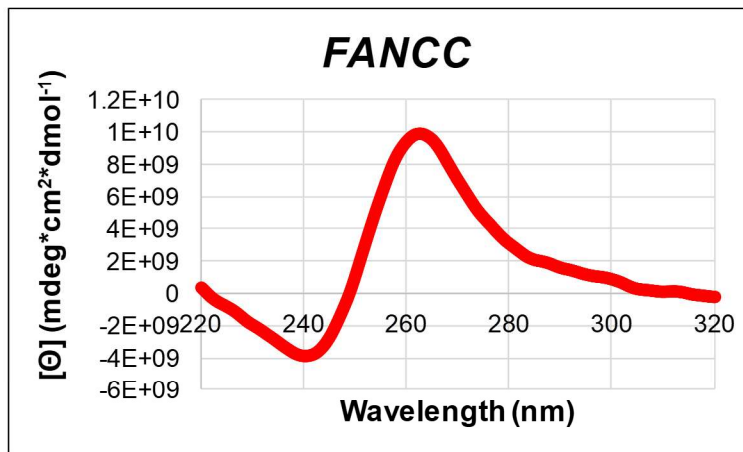

$T_m$  Value

$73.1 \pm 0.6 \text{ } ^\circ\text{C}$

ThT Data

| Sequence                    | ThT           | ssDNA         | dsDNA         | cMYC<br>G4 | FANC<br>CG4 |
|-----------------------------|---------------|---------------|---------------|------------|-------------|
| $\lambda_{em}$ at<br>490 nm | $0.9 \pm 0.1$ | $1.5 \pm 0.1$ | $3.0 \pm 0.1$ | $61 \pm 3$ | $25 \pm 2$  |

TDS

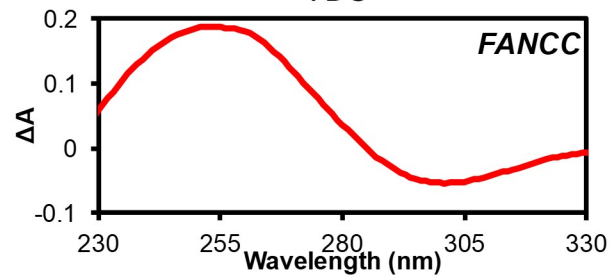

*FEN1*

(template strand)

Sequence

5'-GA GGG AGCA GGGG CCTGC GGGG  
ACCTGGTGT GGG TG

<sup>1</sup>H-NMR

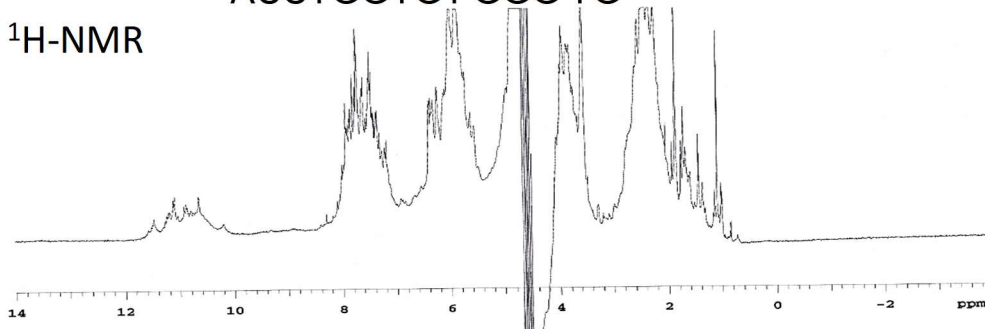

CD Spectrum

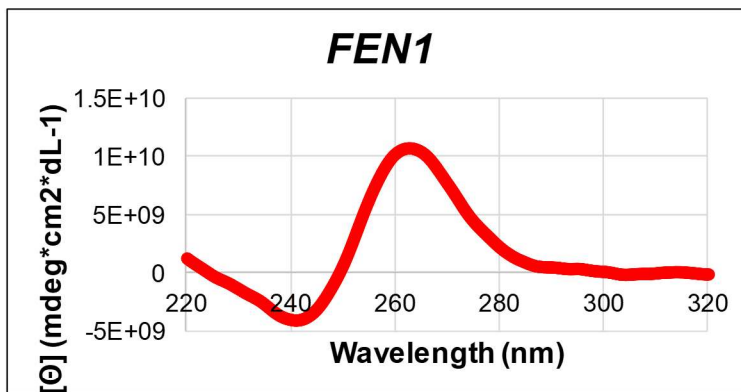

ThT Data

| Sequence                    | ThT          | ssDNA        | dsDNA        | cMYC<br>G4 | <i>FEN1</i><br>G4 |
|-----------------------------|--------------|--------------|--------------|------------|-------------------|
| $\lambda_{em}$ at<br>490 nm | 0.9 ±<br>0.1 | 1.5 ±<br>0.1 | 3.0 ±<br>0.1 | 61 ± 3     | 108 ±<br>4        |

$T_m$  Value  
69.0 ± 0.4 °C

TDS

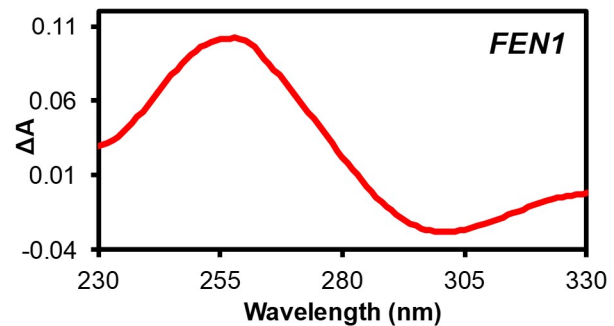

*GTF2H1*  
(coding strand)

Sequence  
5`-GC GGG AACCCGT GGGGG A GGG A GGG AA

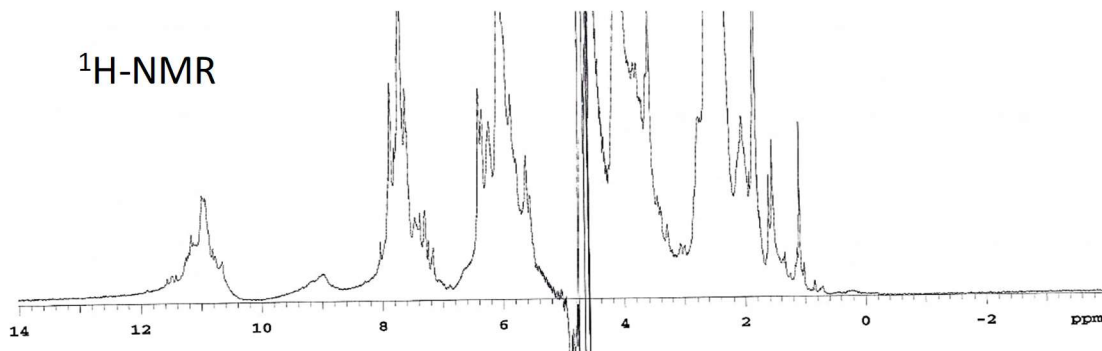

CD Spectrum

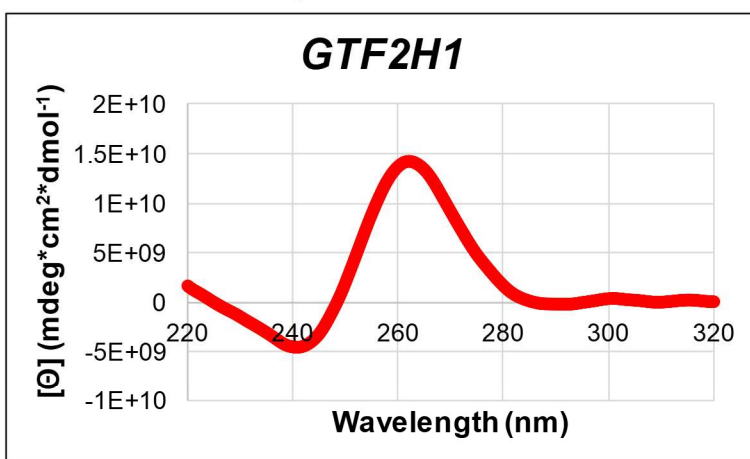

$T_m$  Value  
 $68.1 \pm 0.4$  °C

ThT Data

| Sequence                    | ThT              | ssDNA            | dsDNA            | <i>cMYC</i><br>G4 | <i>GTF2</i><br><i>H1</i> G4 |
|-----------------------------|------------------|------------------|------------------|-------------------|-----------------------------|
| $\lambda_{em}$ at<br>490 nm | $0.9 \pm$<br>0.1 | $1.5 \pm$<br>0.1 | $3.0 \pm$<br>0.1 | $61 \pm 3$        | $15.0 \pm$<br>0.1           |

TDS

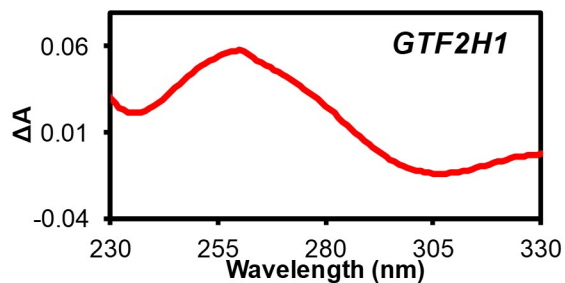

LIG4  
(coding strand)

Sequence  
5'-TT GGGGG TCT GGGGG ATCCGGTCGT  
GGGGG TGTCT GGG AC

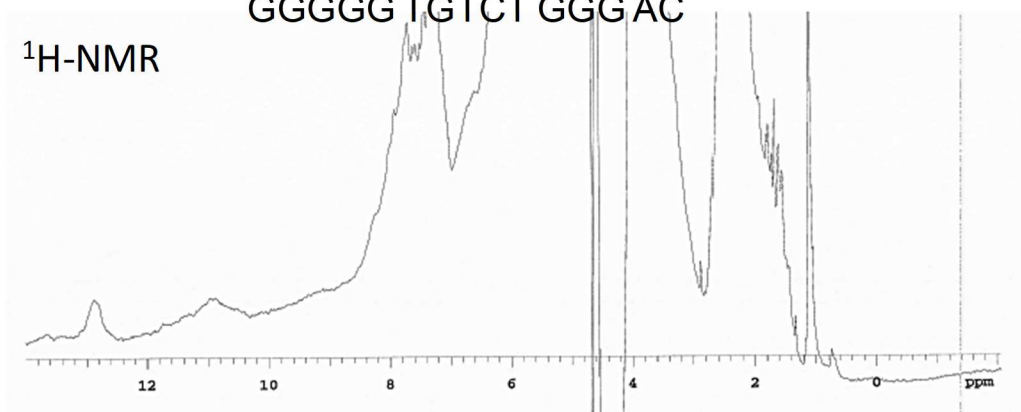

CD Spectrum

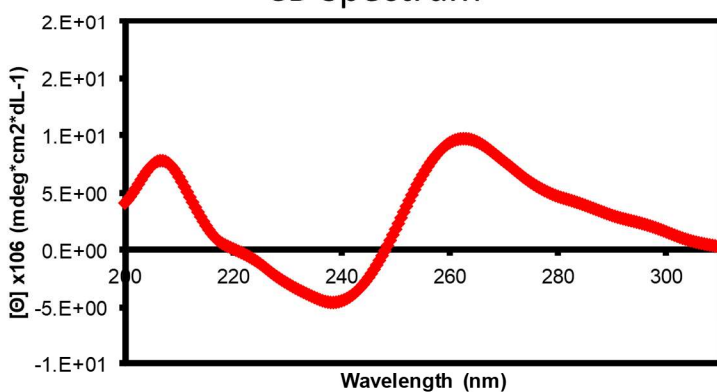

$T_m$  Value  
 $62.6 \pm 1.2$  °C

ThT Data

| Sequence                    | ThT              | ssDNA            | dsDNA            | cMYC<br>G4 | LIG4<br>G4       |
|-----------------------------|------------------|------------------|------------------|------------|------------------|
| $\lambda_{em}$ at<br>490 nm | $0.9 \pm$<br>0.1 | $1.5 \pm$<br>0.1 | $3.0 \pm$<br>0.1 | $61 \pm 3$ | $8.7 \pm$<br>0.1 |

TDS

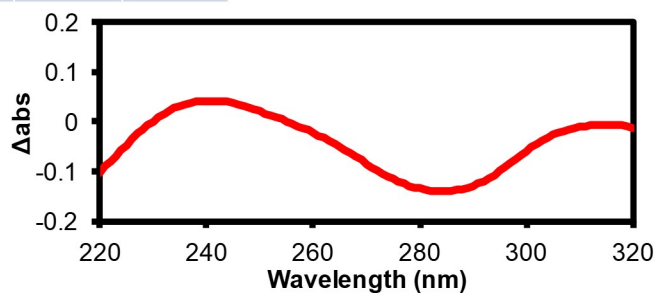

*MGMT*  
(template strand)

Sequence  
5'-CC GGGGG C GGGG CC GGGG CGCGC  
GGGGG CG

<sup>1</sup>H-NMR

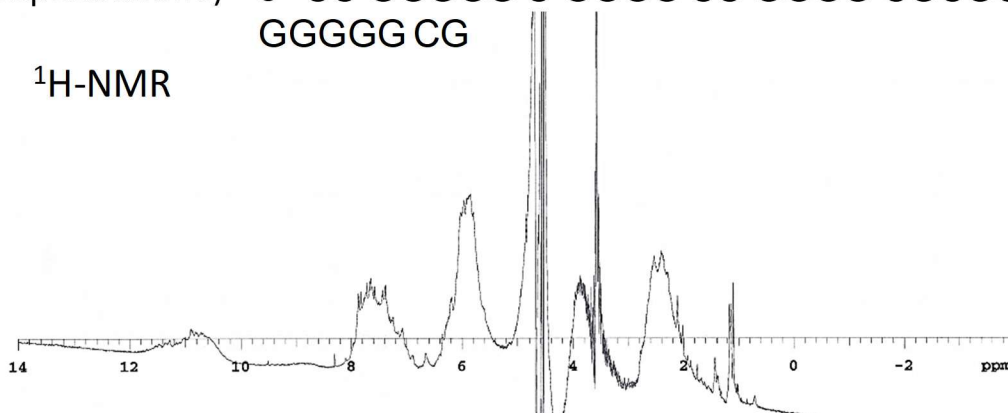

CD Spectrum

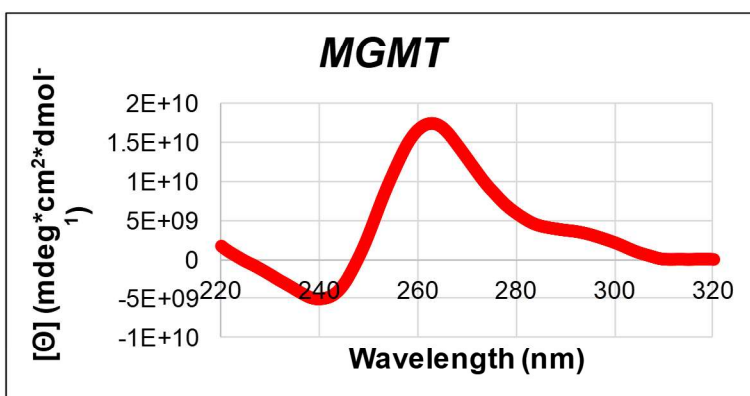

ThT Data

| Sequence                 | ThT       | ssDNA     | dsDNA     | <i>cMYC</i><br>G4 | <i>MGM</i><br>TG4 |
|--------------------------|-----------|-----------|-----------|-------------------|-------------------|
| $\lambda_{em}$ at 490 nm | 0.9 ± 0.1 | 1.5 ± 0.1 | 3.0 ± 0.1 | 61 ± 3            | 27.0 ± 0.1        |

$T_m$  Value

75.4 ± 0.5 °C

TDS

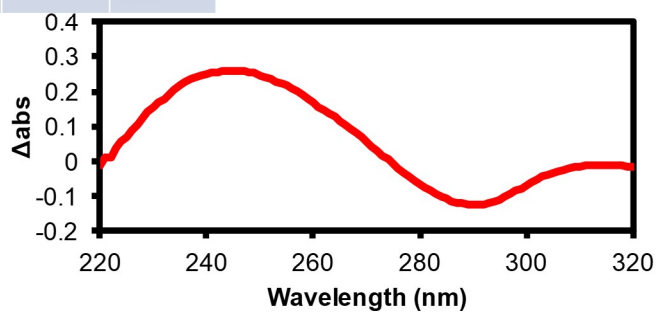

*MMS19*  
(template strand)

Sequence  
5'-AA GGG AGA GGGG CCGGCCT GGGGG C  
GGGG TT

<sup>1</sup>H-NMR

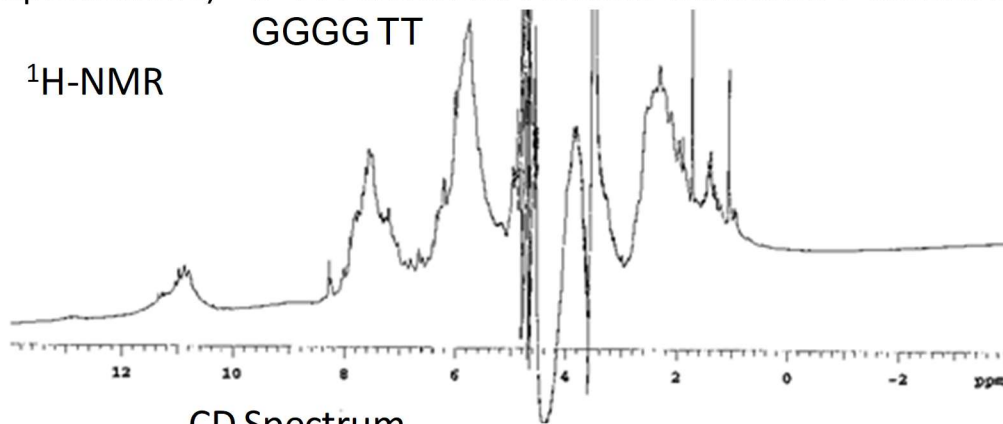

CD Spectrum

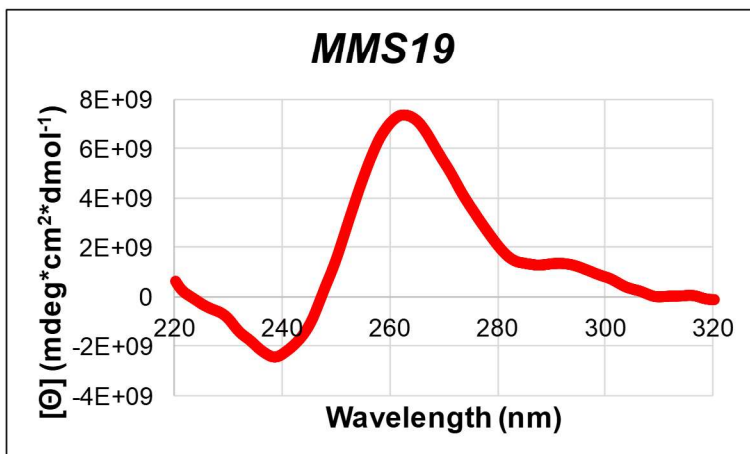

ThT Data

$T_m$  Value

$72.3 \pm 1.0$  °C

| Sequence                    | ThT              | ssDNA            | dsDNA            | <i>cMYC</i><br>G4 | <i>MMS</i><br>19 G4 |
|-----------------------------|------------------|------------------|------------------|-------------------|---------------------|
| $\lambda_{em}$ at<br>490 nm | $0.9 \pm$<br>0.1 | $1.5 \pm$<br>0.1 | $3.0 \pm$<br>0.1 | $61 \pm 3$        | $38 \pm 3$          |

TDS

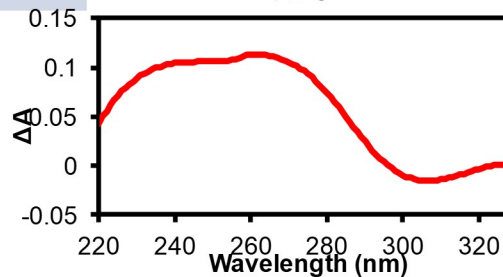



*NEIL1* Sequence  
 (template strand) 5`-CC GGG CCT GGGGG A GGG AAA GGG CC

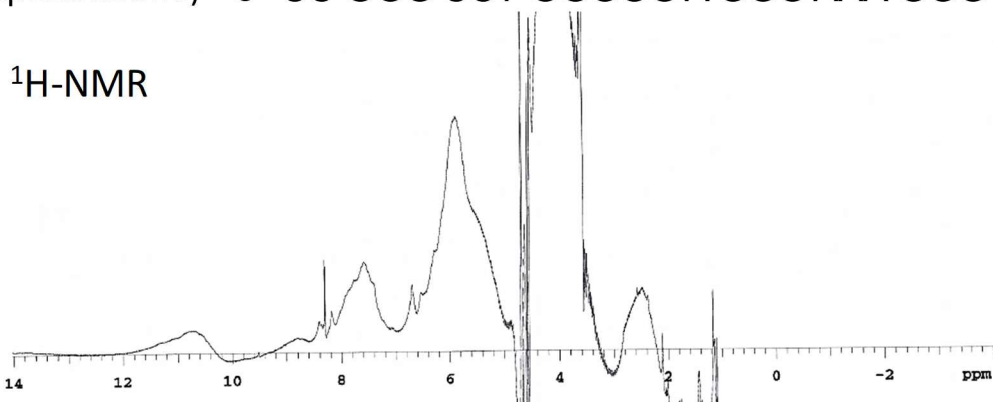

CD Spectrum

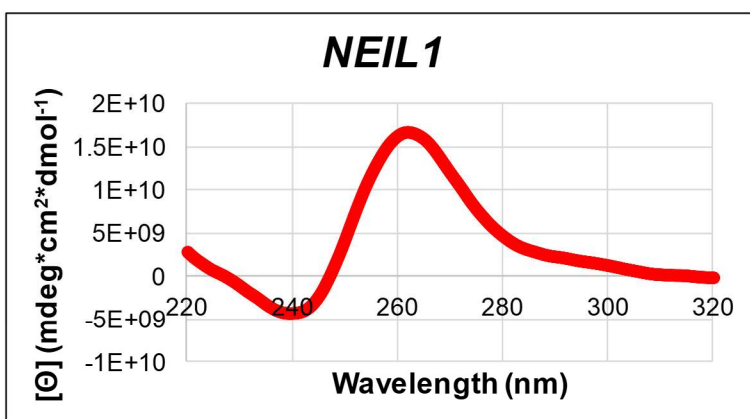

$T_m$  Value  
 $70.1 \pm 0.6$  °C

ThT Data

| Sequence                    | ThT           | ssDNA         | dsDNA         | <i>cMYC</i><br>G4 | <i>NEIL1</i><br>G4 |
|-----------------------------|---------------|---------------|---------------|-------------------|--------------------|
| $\lambda_{em}$ at<br>490 nm | $0.9 \pm 0.1$ | $1.5 \pm 0.1$ | $3.0 \pm 0.1$ | $61 \pm 3$        | $76 \pm 6$         |

TDS

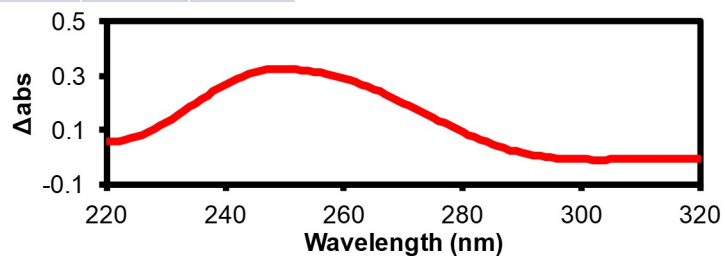

*NEIL3*  
(coding strand)

Sequence  
5'-TT GGG C GGGG CCT GGG C GGGG CC

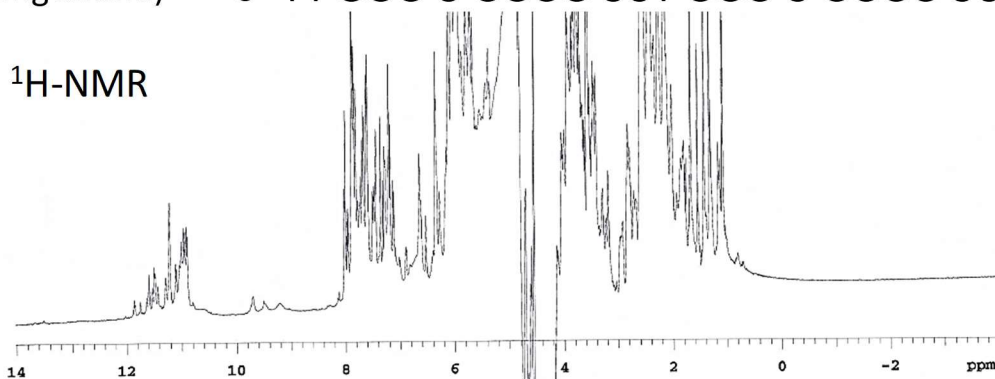

CD Spectrum

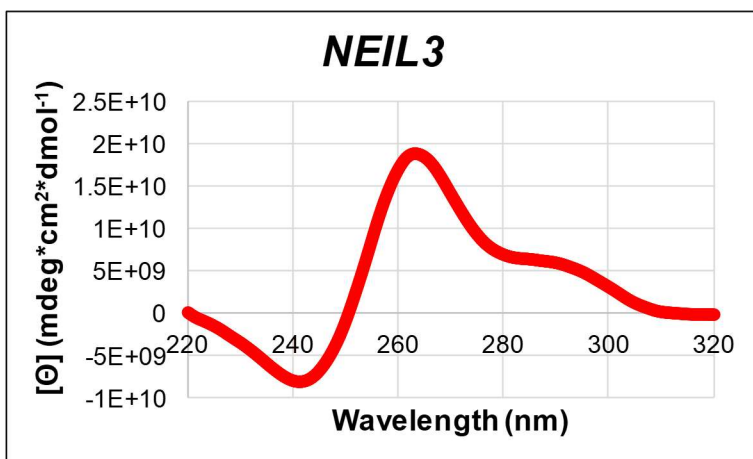

ThT Data

$T_m$  Value  
 $81.5 \pm 0.7$  °C

| Sequence                    | ThT           | ssDNA         | dsDNA         | <i>cMYC</i><br>G4 | <i>NEIL3</i><br>G4 |
|-----------------------------|---------------|---------------|---------------|-------------------|--------------------|
| $\lambda_{em}$ at<br>490 nm | $0.9 \pm 0.1$ | $1.5 \pm 0.1$ | $3.0 \pm 0.1$ | $61 \pm 3$        | $28 \pm 1$         |

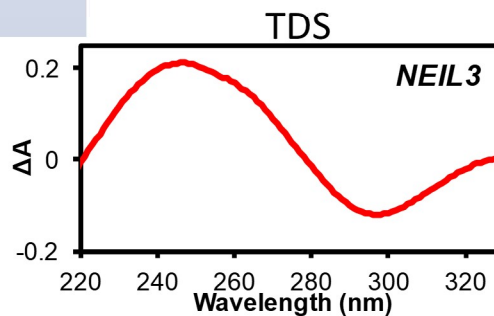

*NTHL1*  
(coding strand)

Sequence  
5`-GT GGG CGC GGG TGA GGG CCC GGG AC

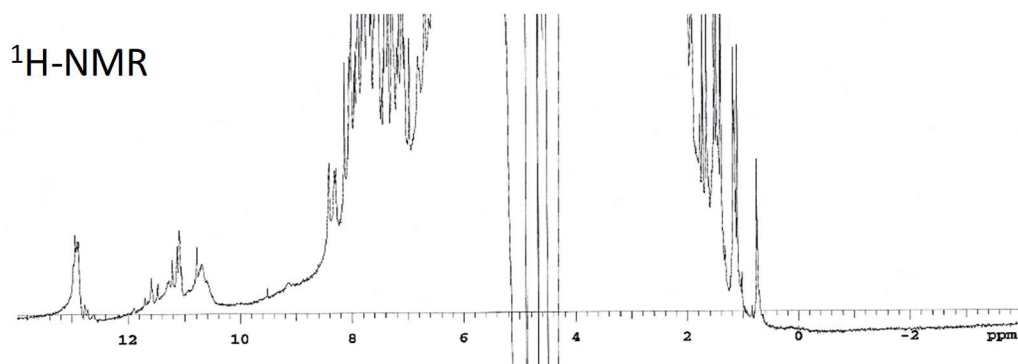

CD Spectrum

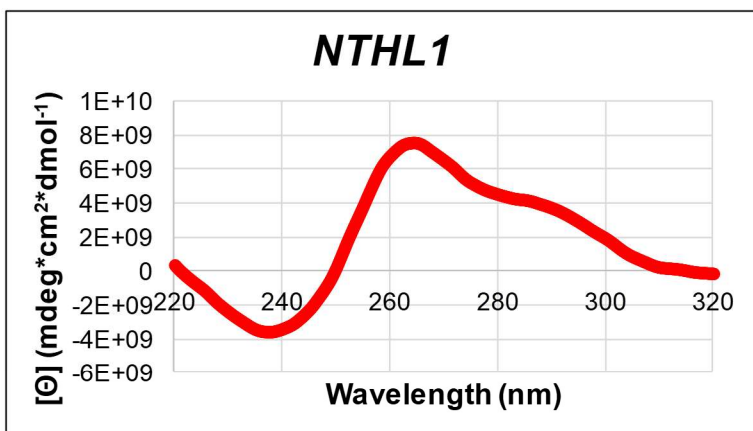

ThT Data

$T_m$  Value  
 $70.9 \pm 0.8 \text{ } ^\circ\text{C}$

| Sequence                    | ThT           | ssDNA         | dsDNA         | <i>cMYC</i><br>G4 | <i>NTHL1</i><br>1 G4 |
|-----------------------------|---------------|---------------|---------------|-------------------|----------------------|
| $\lambda_{em}$ at<br>490 nm | $0.9 \pm 0.1$ | $1.5 \pm 0.1$ | $3.0 \pm 0.1$ | $61 \pm 3$        | $34 \pm 1$           |

TDS

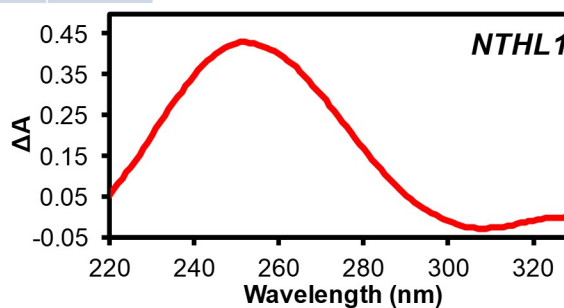

*PARP3*  
(coding strand)

Sequence  
5`-AA GGG CT GGGG AA GGG CC GGG AC

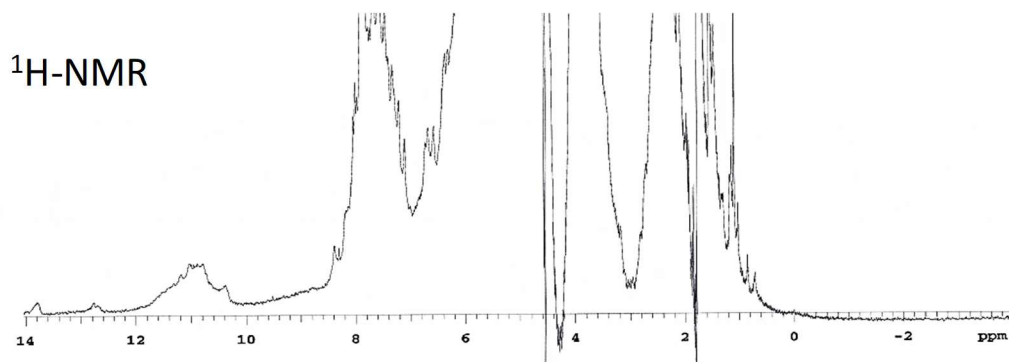

CD Spectrum

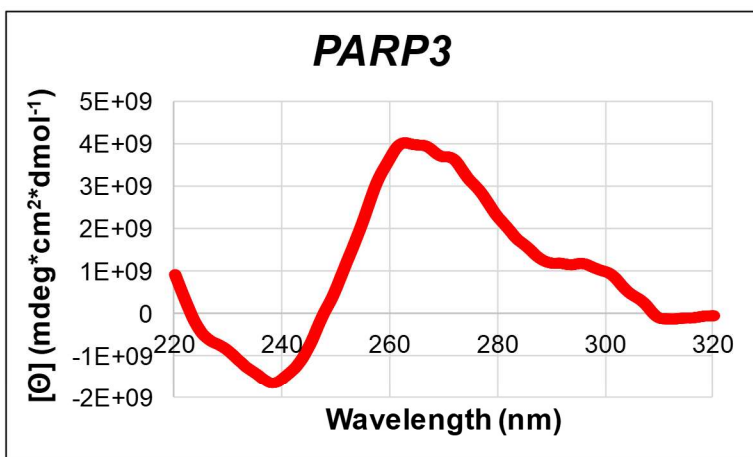

ThT Data

$T_m$  Value  
64.3 ± 1.0 °C

| Sequence                    | ThT          | ssDNA        | dsDNA        | <i>cMYC</i><br>G4 | <i>PARP3</i><br>3 G4 |
|-----------------------------|--------------|--------------|--------------|-------------------|----------------------|
| $\lambda_{em}$ at<br>490 nm | 0.9 ±<br>0.1 | 1.5 ±<br>0.1 | 3.0 ±<br>0.1 | 61 ± 3            | 27 ± 1               |

TDS

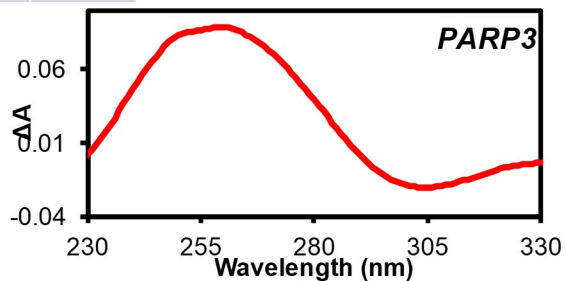

PCNA  
(coding strand)

Sequence  
5'-CA GGG CGAC GGGGG C GGGG C GGGG CG

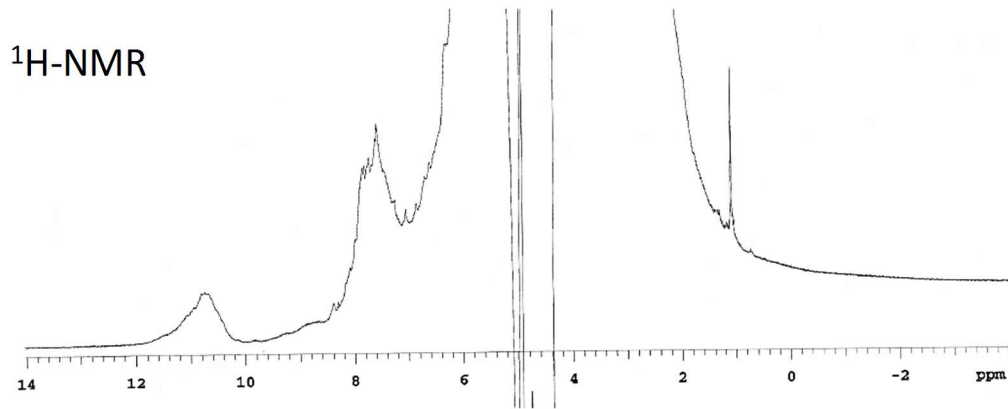

CD Spectrum

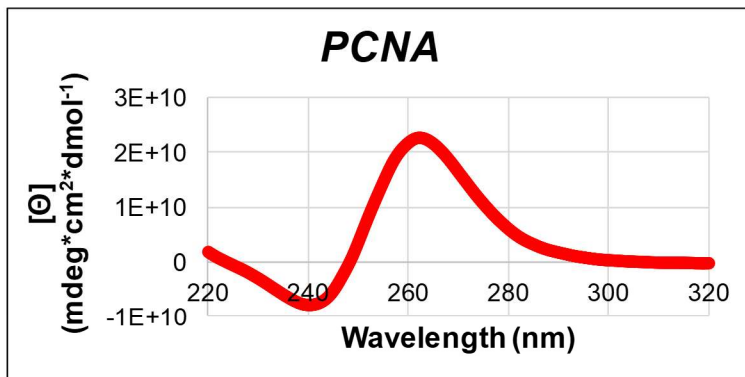

$T_m$  Value  
 $72.7 \pm 0.6$  °C

ThT Data

| Sequence                 | ThT           | ssDNA         | dsDNA         | cMYC G4    | PCNA G4        |
|--------------------------|---------------|---------------|---------------|------------|----------------|
| $\lambda_{em}$ at 490 nm | $0.9 \pm 0.1$ | $1.5 \pm 0.1$ | $3.0 \pm 0.1$ | $61 \pm 3$ | $58.0 \pm 0.6$ |

TDS

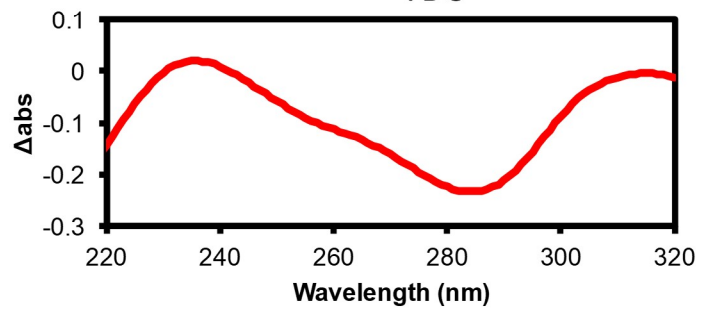

*PMS1*  
(coding strand)

Sequence  
5`-CT GGG TGC GGG TGC GGG TGC GGGG TT

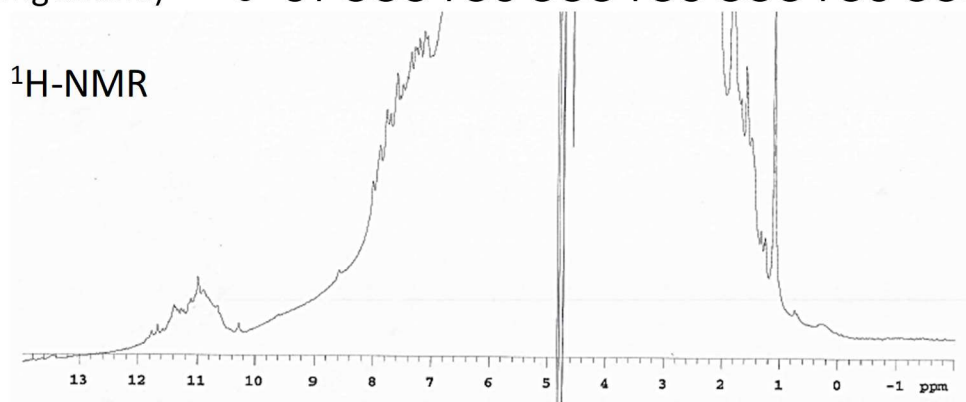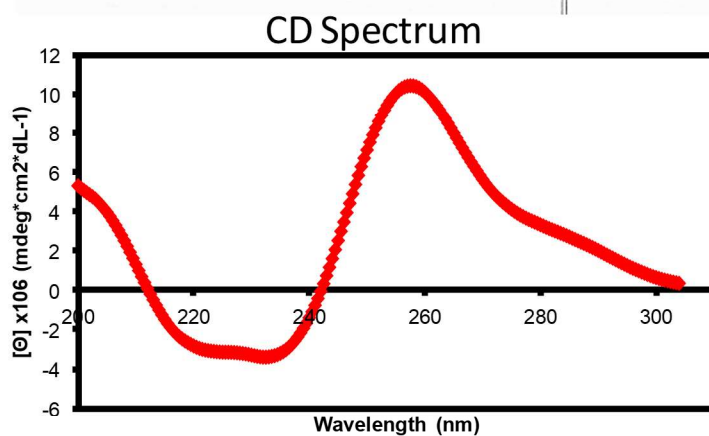

$T_m$  Value  
 $70.1 \pm 0.7$  °C

ThT Data

| Sequence                 | ThT           | ssDNA         | dsDNA         | <i>cMYC</i><br>G4 | <i>PMS1</i><br>G4 |
|--------------------------|---------------|---------------|---------------|-------------------|-------------------|
| $\lambda_{em}$ at 490 nm | $0.9 \pm 0.1$ | $1.5 \pm 0.1$ | $3.0 \pm 0.1$ | $61 \pm 3$        | $59 \pm 1$        |

TDS

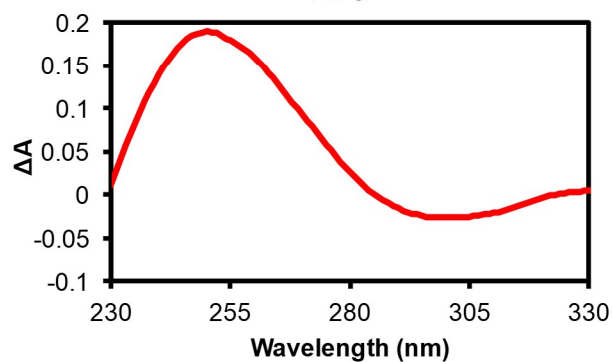

*POLB* Sequence  
 (template strand) 5`-CT GGG C GGGG C GGGG C GGGG CT

<sup>1</sup>H-NMR

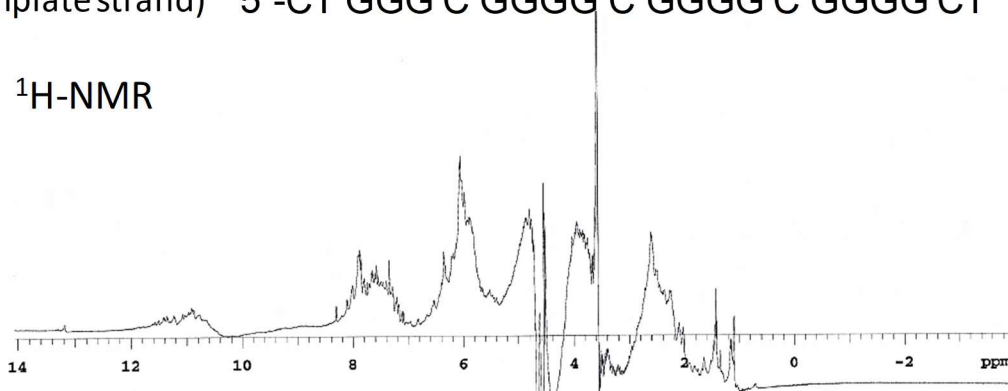

CD Spectrum

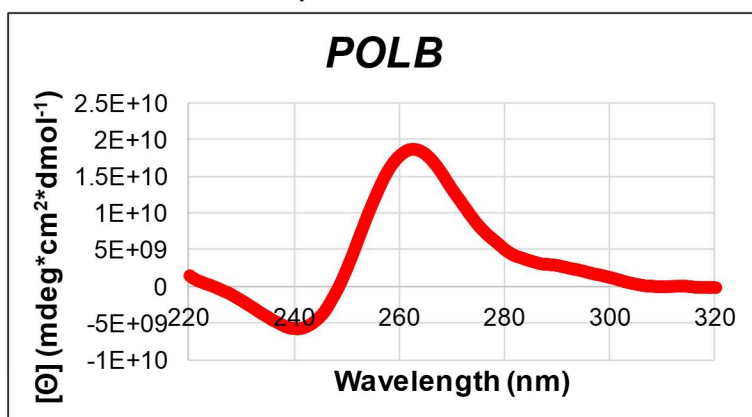

$T_m$  Value  
 $84.7 \pm 1.1$  °C

ThT Data

| Sequence                    | ThT           | ssDNA         | dsDNA         | <i>cMYC</i><br>G4 | <i>POLB</i><br>G4 |
|-----------------------------|---------------|---------------|---------------|-------------------|-------------------|
| $\lambda_{em}$ at<br>490 nm | $0.9 \pm 0.1$ | $1.5 \pm 0.1$ | $3.0 \pm 0.1$ | $61 \pm 3$        | $29 \pm 4$        |

TDS

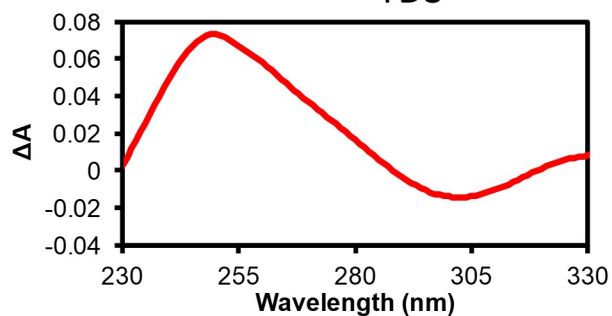

*POLH*  
(coding strand)

Sequence  
5'-CT GGGG CT GGG AGA GGG TGTC GGG AC

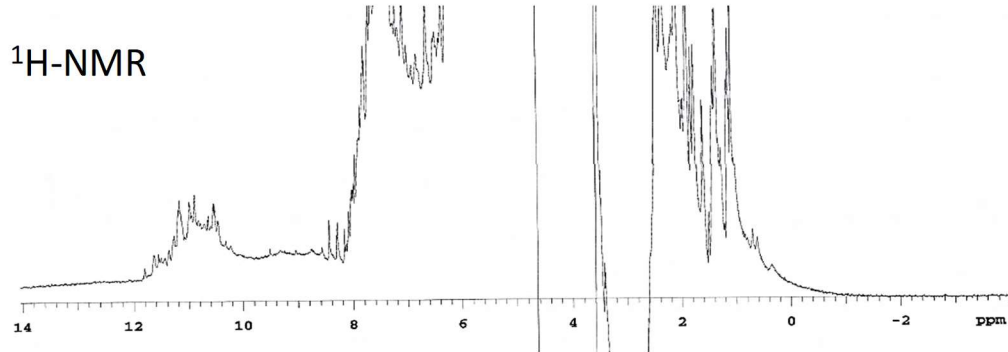

CD Spectrum

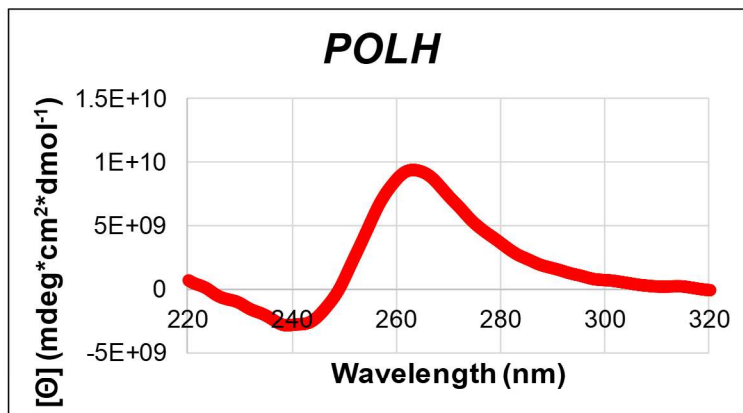

$T_m$  Value  
 $75.6 \pm 0.8$  °C

ThT Data

| Sequence                    | ThT              | ssDNA            | dsDNA            | <i>cMYC</i><br>G4 | <i>POLH</i><br>G4 |
|-----------------------------|------------------|------------------|------------------|-------------------|-------------------|
| $\lambda_{em}$ at<br>490 nm | $0.9 \pm$<br>0.1 | $1.5 \pm$<br>0.1 | $3.0 \pm$<br>0.1 | $61 \pm 3$        | $95 \pm$<br>10    |

TDS

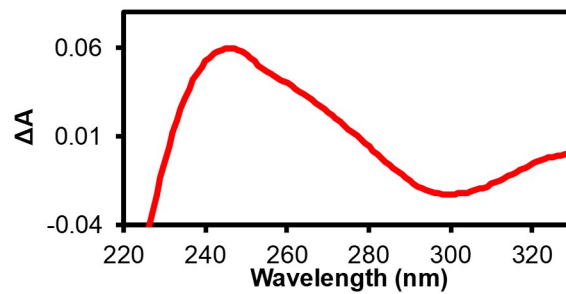



*POLL*  
 (template strand) Sequence 5'-CC GGG AA GGG CCTCA GGG CCT GGG TT

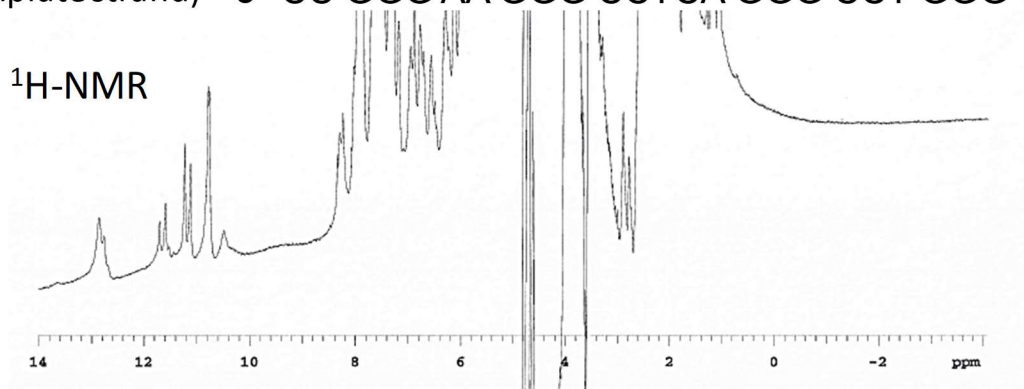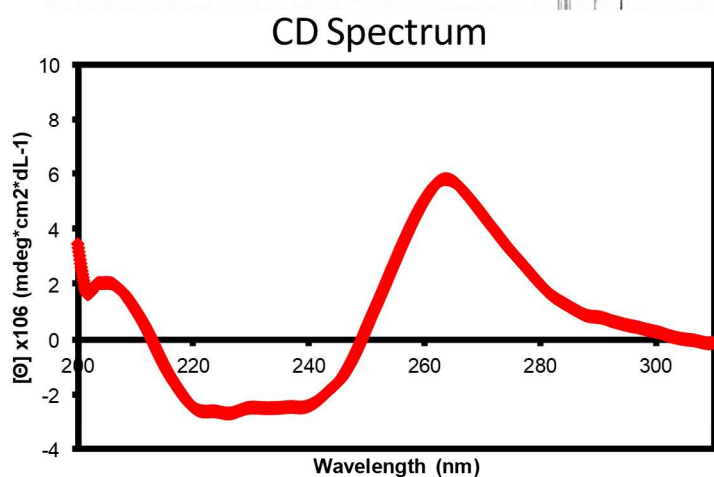

$T_m$  Value  
 $68.2 \pm 0.9$  °C

ThT Data

| Sequence                    | ThT                  | ssDNA                | dsDNA                | <i>cMYC</i><br>G4  | <i>POLL</i><br>G4   |
|-----------------------------|----------------------|----------------------|----------------------|--------------------|---------------------|
| $\lambda_{em}$ at<br>490 nm | $0.09 \pm$<br>$0.01$ | $0.15 \pm$<br>$0.01$ | $0.30 \pm$<br>$0.01$ | $6.1 \pm$<br>$0.3$ | $46.5 \pm$<br>$2.0$ |

TDS

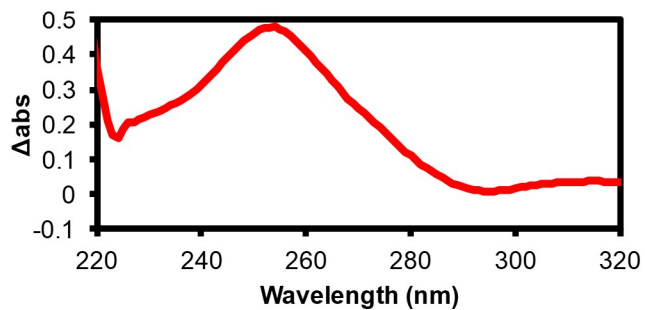

*POLZ* Sequence  
 (template strand) 5'-GA GGG AA GGG C GGG C GGG CG

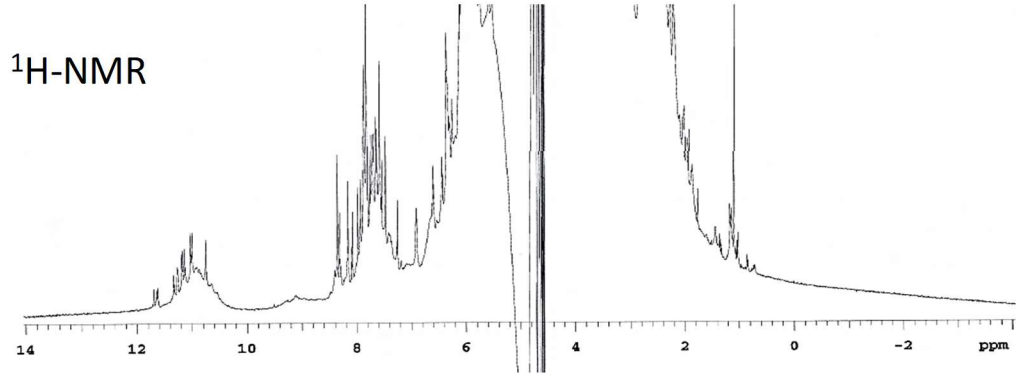

CD Spectrum

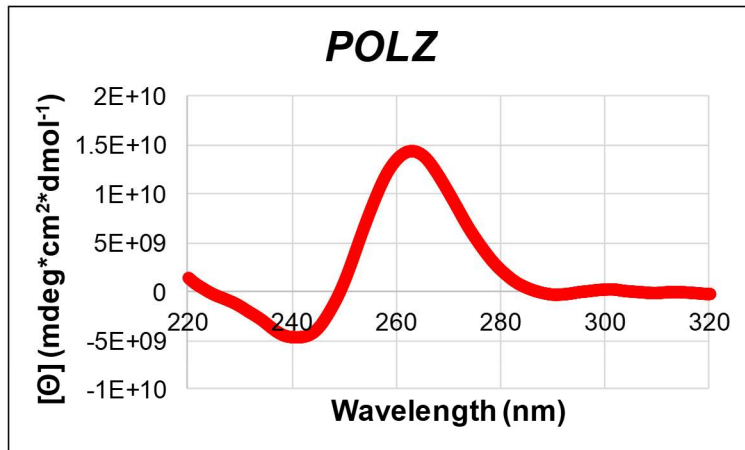

$T_m$  Value  
 $83.8 \pm 0.5$  °C

ThT Data

| Sequence                    | ThT           | ssDNA         | dsDNA         | <i>cMYC</i><br>G4 | <i>POLZ</i><br>G4 |
|-----------------------------|---------------|---------------|---------------|-------------------|-------------------|
| $\lambda_{em}$ at<br>490 nm | $0.9 \pm 0.1$ | $1.5 \pm 0.1$ | $3.0 \pm 0.1$ | $61 \pm 3$        | $59 \pm 9$        |

TDS

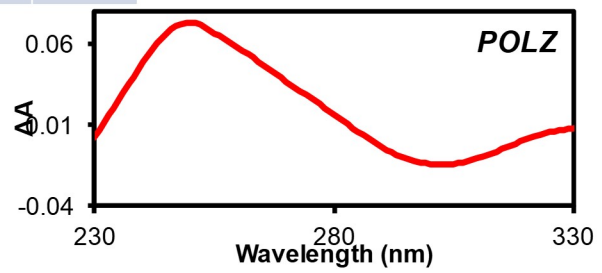

*PRKDC*  
(coding strand)

Sequence  
5'-TA GGGG CATTTC GGG TCC GGG CCGAGC  
GGG CG

<sup>1</sup>H-NMR

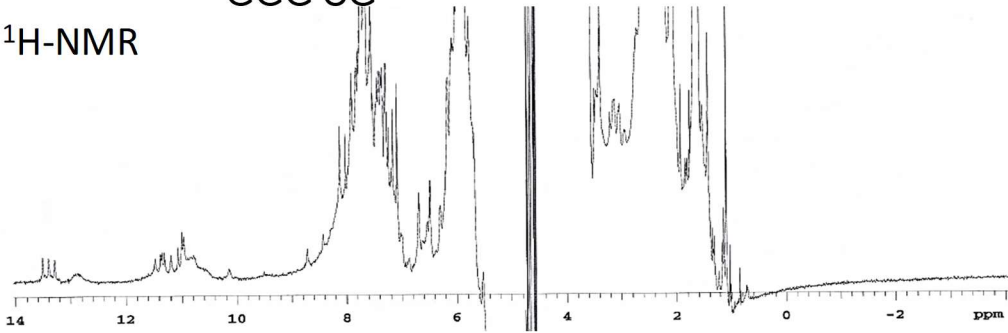

CD Spectrum

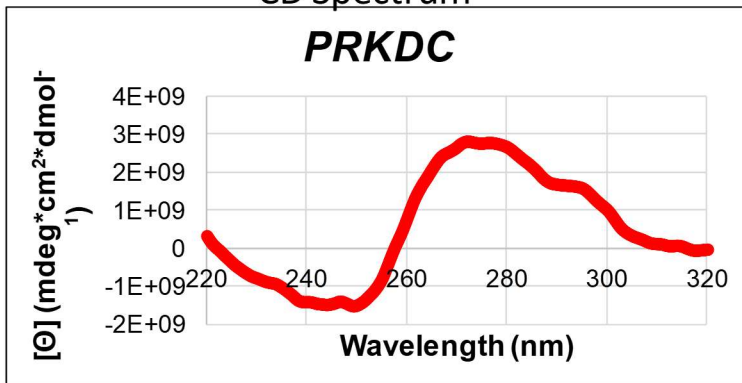

$T_m$  Value  
 $54.1 \pm 0.5 \text{ } ^\circ\text{C}$

ThT Data

| Sequence                    | ThT           | ssDNA         | dsDNA         | <i>cMYC</i><br>G4 | <i>PRKD</i><br>CG4 |
|-----------------------------|---------------|---------------|---------------|-------------------|--------------------|
| $\lambda_{em}$ at<br>490 nm | $0.9 \pm 0.1$ | $1.5 \pm 0.1$ | $3.0 \pm 0.1$ | $61 \pm 3$        | $29.0 \pm 0.1$     |

TDS

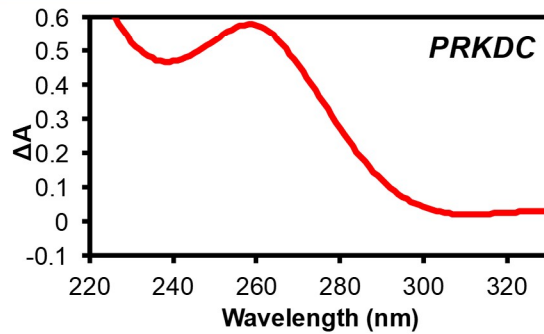

RAD9A  
(coding strand)

Sequence  
5'-AT GGGG A GGC GGGGG C GGGG CCGGCA  
GGGG CG

<sup>1</sup>H-NMR

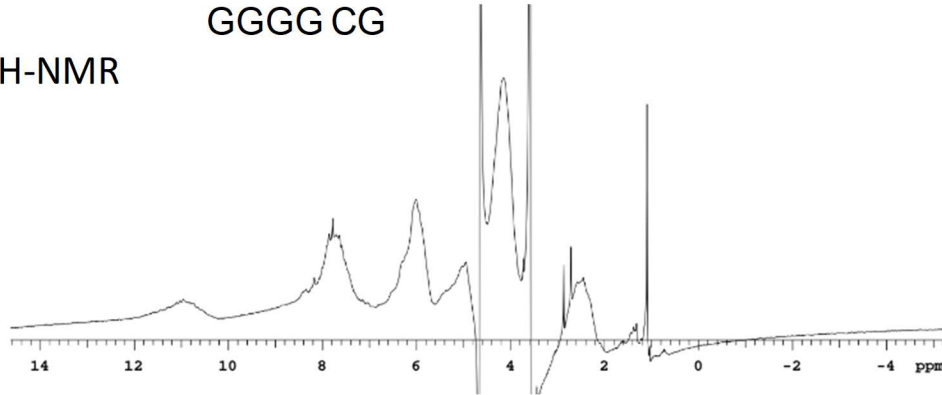

CD Spectrum

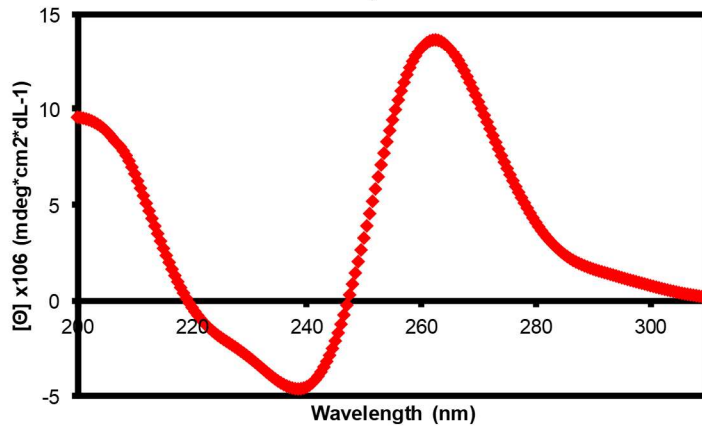

$T_m$  Value  
 $77.6 \pm 1.1$  °C

ThT Data

| Sequence                    | ThT           | ssDNA         | dsDNA         | cMYC<br>G4 | RAD9<br>G4  |
|-----------------------------|---------------|---------------|---------------|------------|-------------|
| $\lambda_{em}$ at<br>490 nm | $0.9 \pm 0.1$ | $1.5 \pm 0.1$ | $3.0 \pm 0.1$ | $61 \pm 3$ | $55 \pm 14$ |

TDS

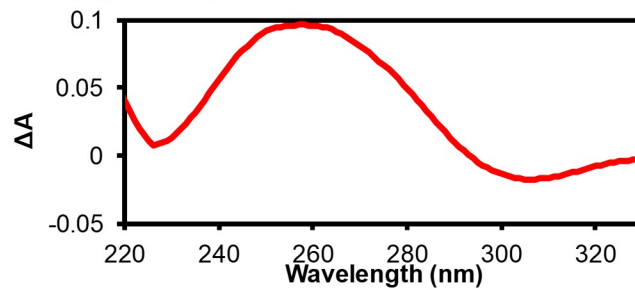

*RAD17* Sequence  
 (template strand) 5'-CC GGG A GGG ACT GGG CT GGGG CA

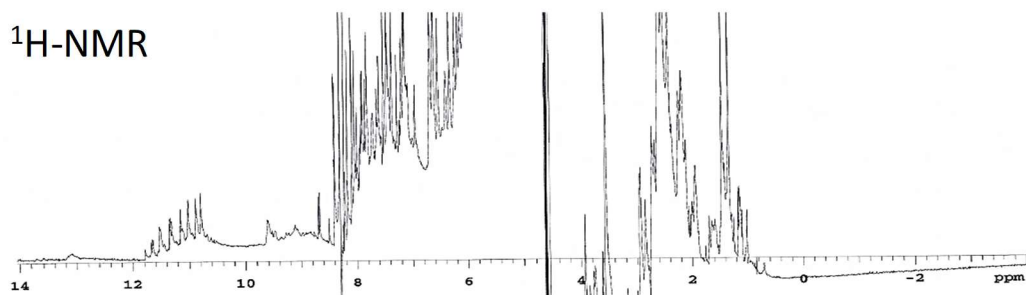

CD Spectrum

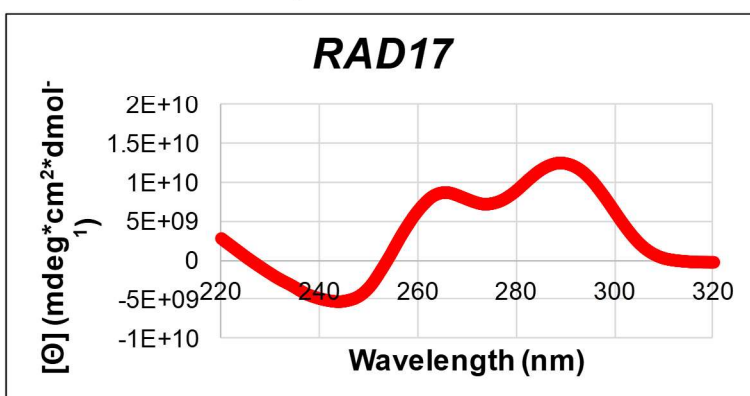

$T_m$  Value  
 $69.5 \pm 0.8 \text{ } ^\circ\text{C}$

ThT Data

| Sequence                    | ThT           | ssDNA         | dsDNA         | <i>cMYC</i><br>G4 | <i>RAD1</i><br>7 G4 |
|-----------------------------|---------------|---------------|---------------|-------------------|---------------------|
| $\lambda_{em}$ at<br>490 nm | $0.9 \pm 0.1$ | $1.5 \pm 0.1$ | $3.0 \pm 0.1$ | $61 \pm 3$        | $20.6 \pm 0.3$      |

TDS

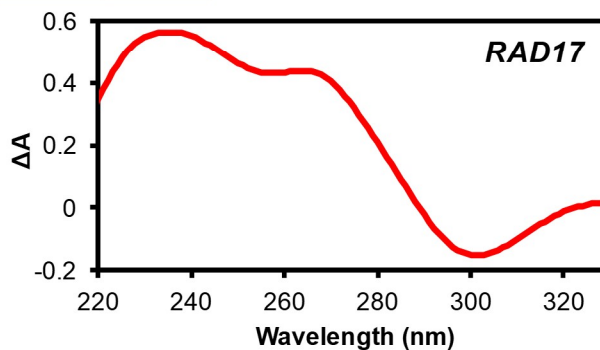

*RAD54L*

Sequence

(template strand) 5`-GA GGGG C GGGG C GGGGG C GGGGG TG

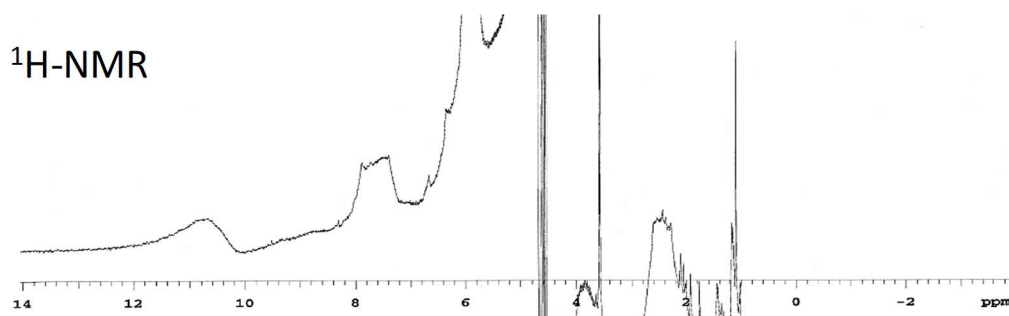

CD Spectrum

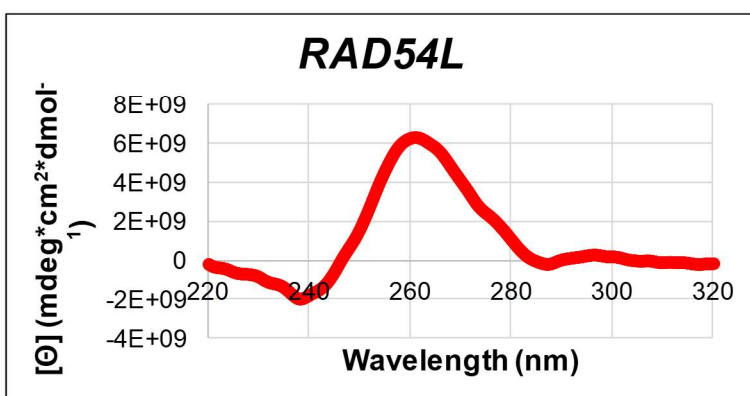

$T_m$  Value  
87.3 ± 1.1 °C

ThT Data

| Sequence                    | ThT          | ssDNA        | dsDNA        | <i>cMYC</i><br>G4 | <i>RAD5</i><br>4L G4 |
|-----------------------------|--------------|--------------|--------------|-------------------|----------------------|
| $\lambda_{em}$ at<br>490 nm | 0.9 ±<br>0.1 | 1.5 ±<br>0.1 | 3.0 ±<br>0.1 | 61 ± 3            | 10 ± 1               |

TDS

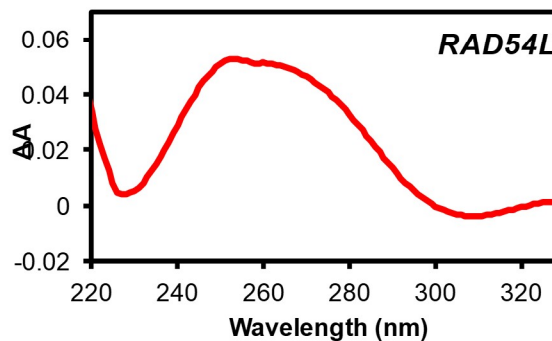

*RECQL*  
(coding strand)

Sequence  
5'-CA GGG T GGG AAGCTGAGTC GGG  
AGAAATGAAGCC GGG AA

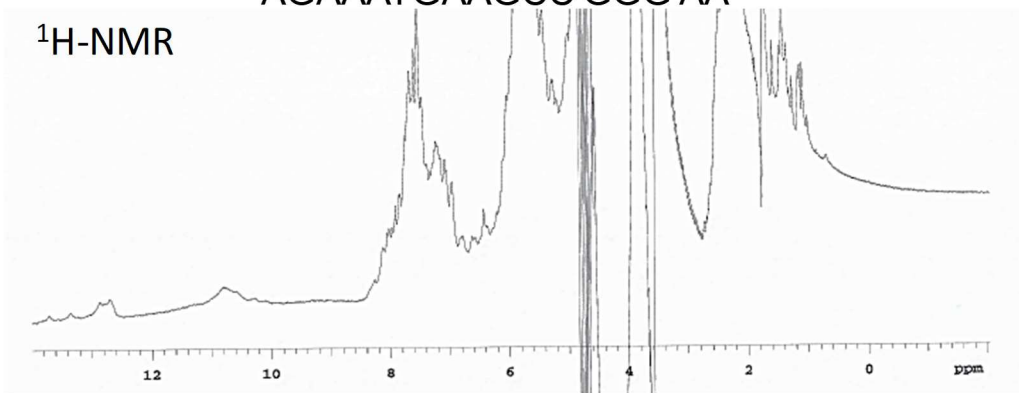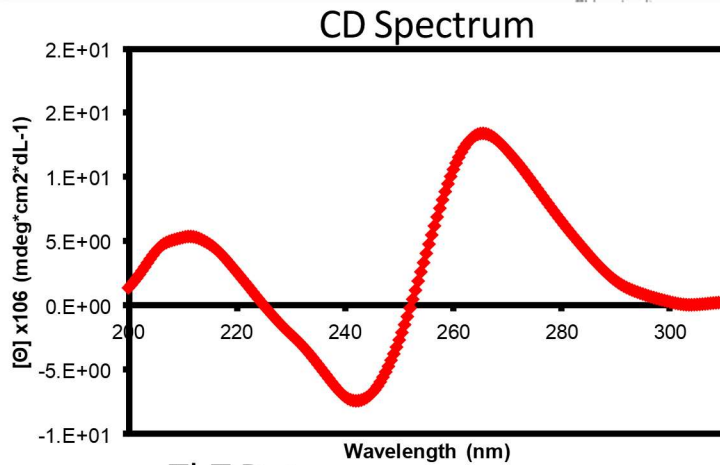

$T_m$  Value

$51.7 \pm 1.1$  °C

ThT Data

| Sequence                    | ThT              | ssDNA            | dsDNA            | <i>cMYC</i><br>G4 | <i>RECQ</i><br>LG4 |
|-----------------------------|------------------|------------------|------------------|-------------------|--------------------|
| $\lambda_{em}$ at<br>490 nm | $0.9 \pm$<br>0.1 | $1.5 \pm$<br>0.1 | $.30 \pm$<br>0.1 | $61 \pm 3$        | $105 \pm$<br>3     |

TDS

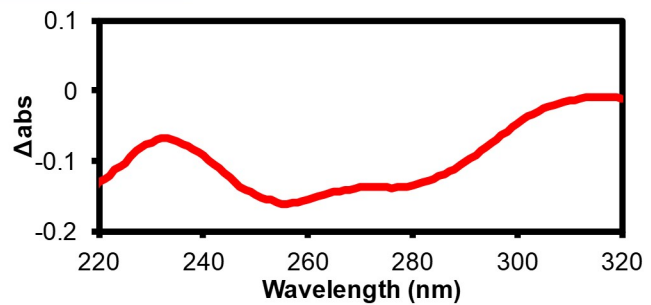

REV1  
(coding strand)

Sequence  
5`-CA GGG C GGGG CC GGGG A GGGG AG

<sup>1</sup>H-NMR

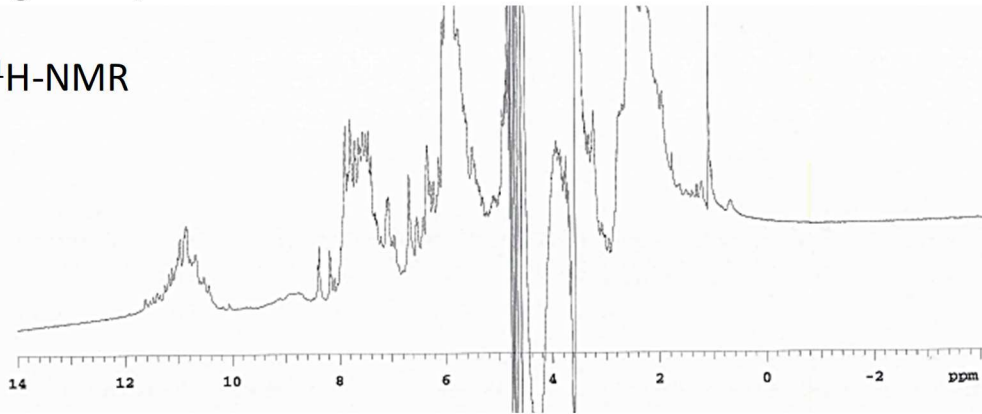

CD Spectrum

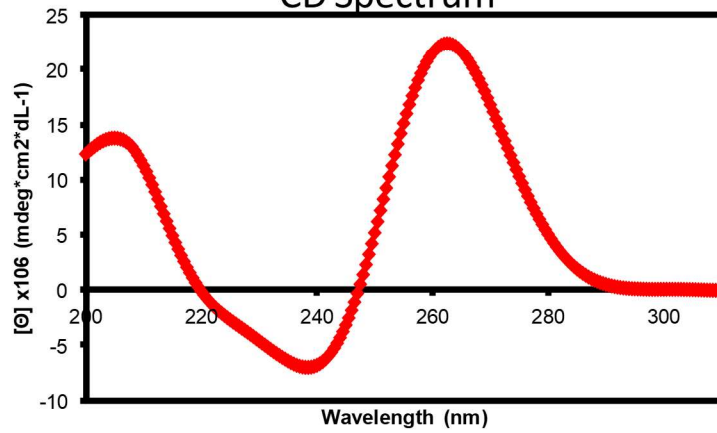

$T_m$  Value  
 $81.6 \pm 1.2$  °C

ThT Data

| Sequence                    | ThT           | ssDNA         | dsDNA         | cMYC<br>G4 | REV1<br>G4 |
|-----------------------------|---------------|---------------|---------------|------------|------------|
| $\lambda_{em}$ at<br>490 nm | $0.9 \pm 0.1$ | $1.5 \pm 0.1$ | $3.0 \pm 0.1$ | $61 \pm 3$ | $93 \pm 1$ |

TDS

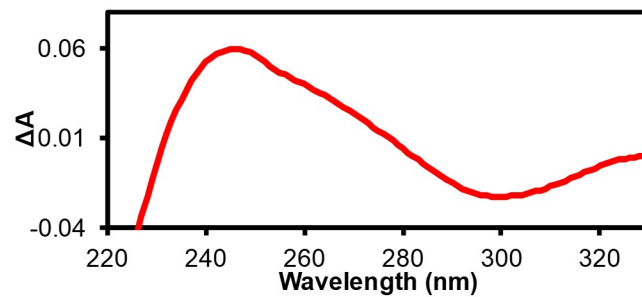



RPA1  
(coding strand)

Sequence  
5`-GC GGG CGCT GGG A GGG AGACCA GGG CG

<sup>1</sup>H-NMR

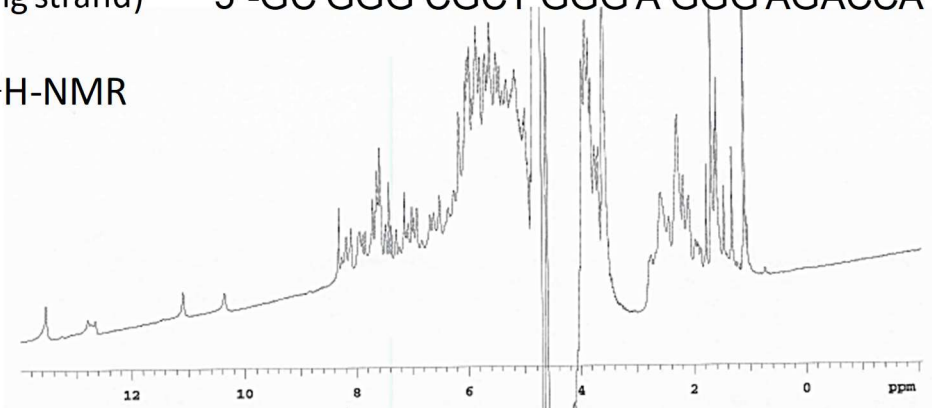

CD Spectrum

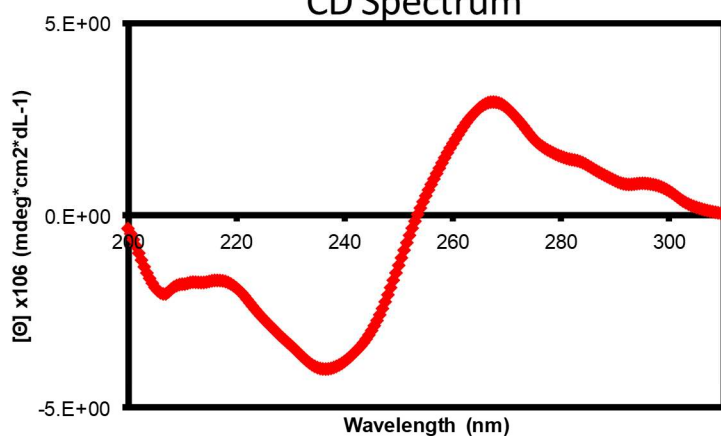

$T_m$  Value

This sequence failed to provide a temperature-dependent transition at 295 nm.

ThT Data

| Sequence                 | ThT           | ssDNA         | dsDNA         | cMYC G4    | RPA1 G4     |
|--------------------------|---------------|---------------|---------------|------------|-------------|
| $\lambda_{em}$ at 490 nm | $0.9 \pm 0.1$ | $1.5 \pm 0.1$ | $3.0 \pm 0.1$ | $61 \pm 3$ | $103 \pm 6$ |

TDS

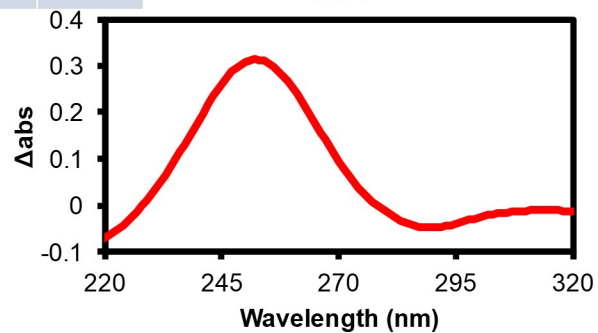

*UBE2B* Sequence  
 (template strand) 5`-GC GGG TTTAAGA GGG TGA GGG C GGG TA

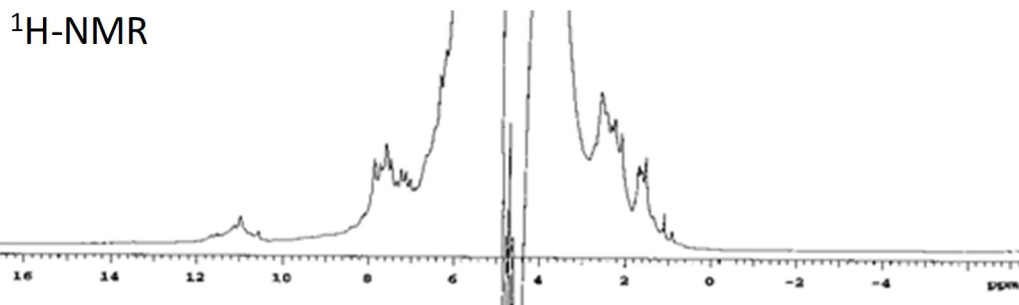

CD Spectrum

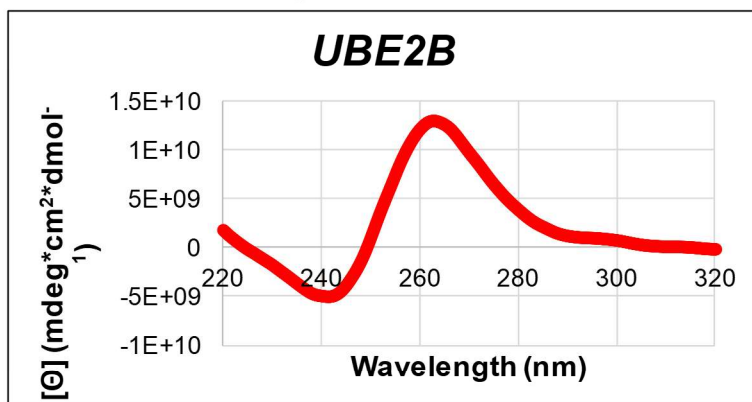

$T_m$  Value  
 $63.2 \pm 0.4$  °C

ThT Data

| Sequence                    | ThT           | ssDNA         | dsDNA         | <i>cMYC</i><br>G4 | <i>UBE2B</i><br>G4 |
|-----------------------------|---------------|---------------|---------------|-------------------|--------------------|
| $\lambda_{em}$ at<br>490 nm | $0.9 \pm 0.1$ | $1.5 \pm 0.1$ | $3.0 \pm 0.1$ | $61 \pm 3$        | $97 \pm 7$         |

TDS

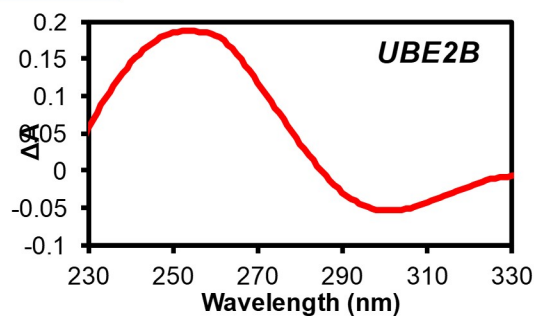

*WRN* Sequence  
 (template strand) 5`-GA GGGG A GGG AA GGGG AGGC GGGG AG

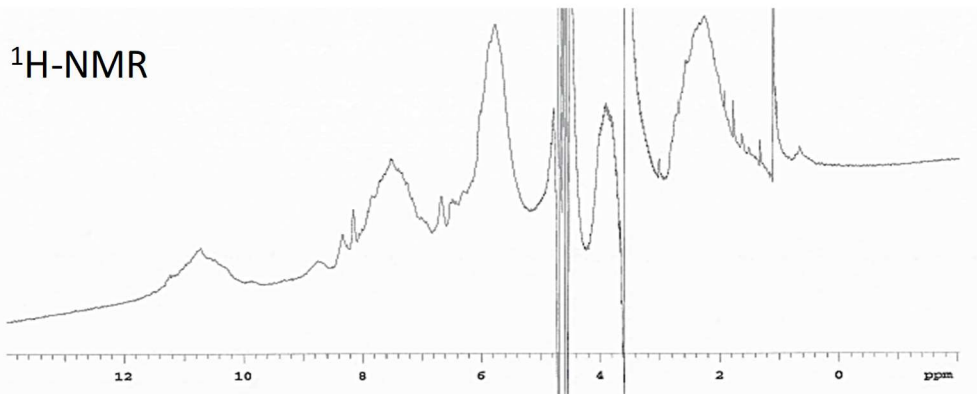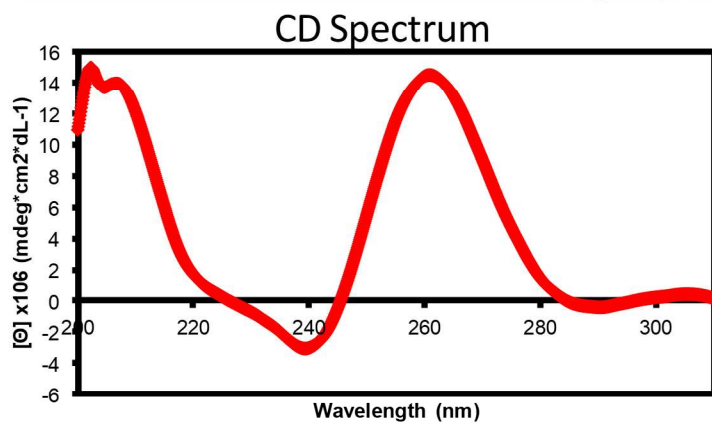

$T_m$  Value  
 $69.4 \pm 1.0$  °C

ThT Data

| Sequence                    | ThT           | ssDNA         | dsDNA         | <i>cMYC</i><br>G4 | <i>WRN</i><br>G4 |
|-----------------------------|---------------|---------------|---------------|-------------------|------------------|
| $\lambda_{em}$ at<br>490 nm | $0.9 \pm 0.1$ | $1.5 \pm 0.1$ | $3.0 \pm 0.1$ | $61 \pm 3$        | $77 \pm 3$       |

TDS

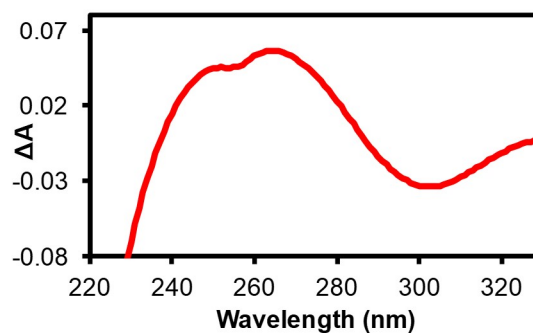

**XAB2** Sequence  
 (template strand) 5`-GT GGG TT GGG AGGCT GGG CA GGGG AT

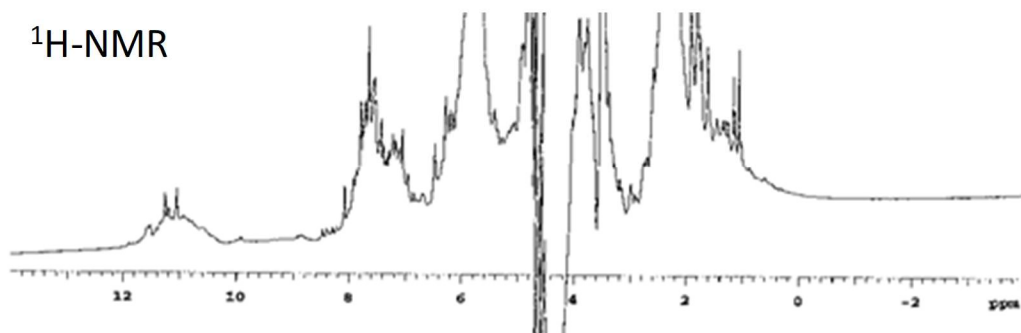

CD Spectrum

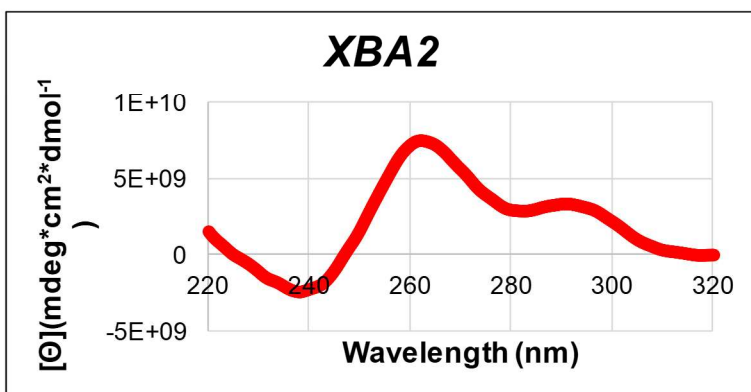

$T_m$  Value  
 $67.1 \pm 1.0$  °C

ThT Data

| Sequence                 | ThT           | ssDNA         | dsDNA         | cMYC G4    | XAB2 G4    |
|--------------------------|---------------|---------------|---------------|------------|------------|
| $\lambda_{em}$ at 490 nm | $0.9 \pm 0.1$ | $1.5 \pm 0.1$ | $3.0 \pm 0.1$ | $61 \pm 3$ | $83 \pm 1$ |

TDS

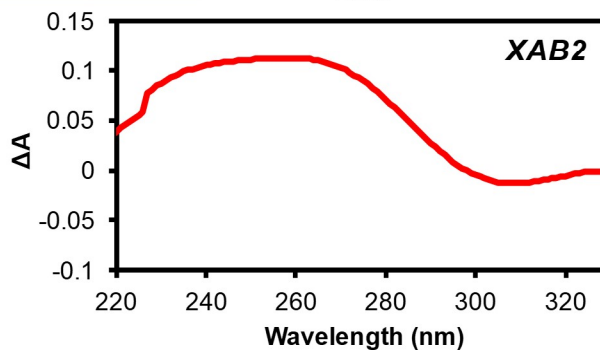

**Figure S2.** Native PAGE for the 30 PQSs.

Analysis at 20 °C and 10  $\mu$ M DNA.

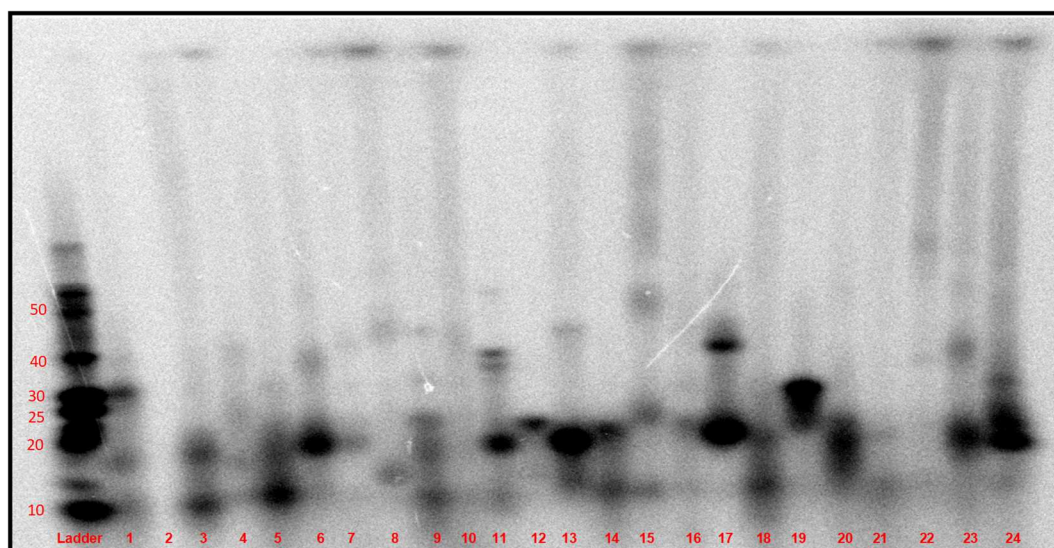

Analysis at 20 °C and 300  $\mu$ M DNA.

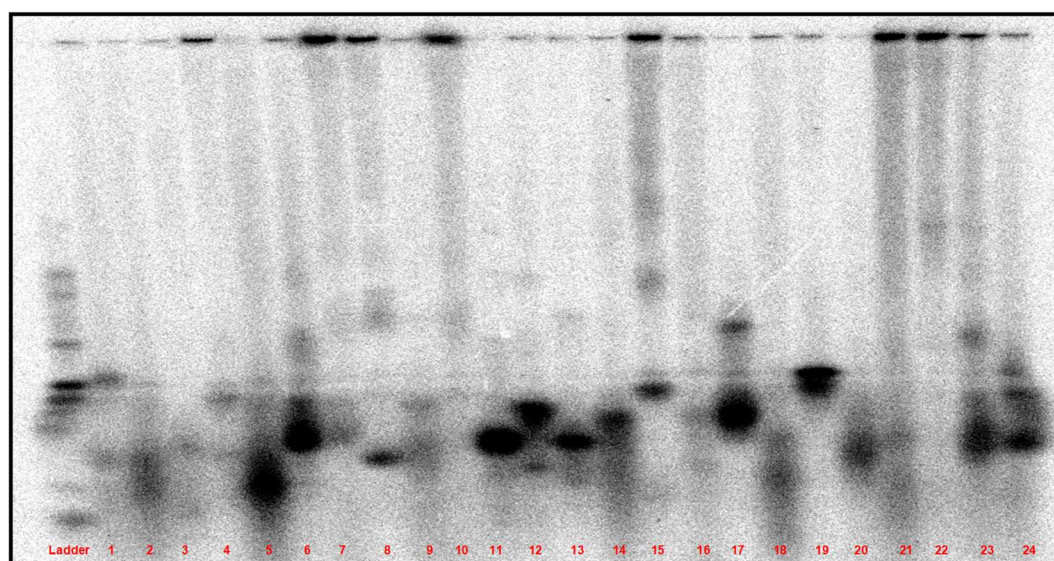

1 = FAAP24 (31 nts), 2 = ERCC8 (28 nts), 4 = FANCA (34 nts), 5 = FANCC (25 nts), 6 = FEN1 (26 nts), 7 = GTF2H1 (28 nts), 8 = MGMT (30 nts), 9 = NEIL1 (25 nts), 10 = NEIL3 (23 nts), 11 = NTHL1 (25 nts), 12 = PARP3 (23 nts), 13 = PCNA (26 nts), 14 = POLH (26 nts), 15 = POLZ (20 nts), 16 = PRKDC (33 nts), 17 = RAD9A (32 nts), 18 = RAD17 (23 nts), 19 = RAD54L (25 nts), 20 = REV1 (23 nts), 21 = SHPRH, 22 = UBE2B (27 nts), 23 = WRN (26 nts), 24 = XAB2 (26 nts), and ladder = poly-dC<sub>n</sub> (n = 10, 20, 25, 30, 40, and 50 nts).

Analysis at 4 °C and 10 μM DNA.

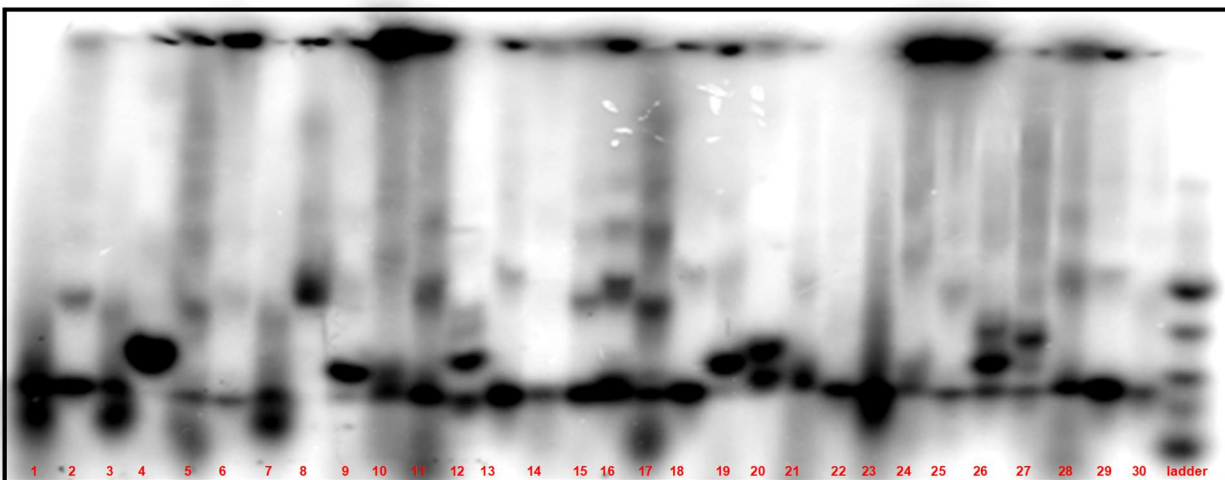

1 = *BLM* (20 nts), 2 = *FAAP24* (31 nts), 3 = *ERCC8* (28 nts), 4 = *FANCA* (34 nts), 5 = *FANCC* (25 nts), 6 = *FEN1* (26 nts), 7 = *GTF2H1* (28 nts), 8 = *LIG4* (40 nts), 9 = *MGMT* (30 nts), 10 = *MMS19* (31 nts), 11 = *NEIL1* (25 nts), 12 = *NEIL3* (23 nts), 13 = *NTHL1* (25 nts), 14 = *PARP3* (23 nts), 15 = *PCNA* (26 nts), 16 = *PMS1* (26 nts), 17 = *POLB* (22 nts), 18 = *POLH* (26 nts), 19 = *POLZ* (20 nts), 20 = *PRKDC* (33 nts), 21 = *RAD9A* (32 nts), 22 = *RAD17* (23 nts), 23 = *RAD54L* (25 nts), 24 = *RECQL* (39 nts), 25 = *REV1* (23 nts), 26 = *RPA1* (27 nts), 27 = *SHPRH*, 28 = *UBE2B* (27 nts), 29 = *WRN* (26 nts), 30 = *XAB2* (26 nts), and ladder = poly-dC<sub>n</sub> (n = 10, 15, 20, 30, 40 nts).

Note: Some wells have material that did not migrate that cannot be interpreted as unimolecular or multimolecular G-quadruplex folds. The material in the wells dramatically increased when the gel was conducted at 4 °C.

**Figure S3.** Probability of folding for the 30 PQSs studied.

| <b>PQS</b>    | <b><sup>1</sup>H-NMR Signals</b> | <b>G4-specific CD Signature</b> | <b>TDS Profile</b> | <b>G4-specific <math>T_m</math> (295 nm)</b> | <b>ThT</b> | <b>Probability of Folding</b> |
|---------------|----------------------------------|---------------------------------|--------------------|----------------------------------------------|------------|-------------------------------|
| <i>BLM</i>    | +                                | + (Parallel G4)                 | +                  | +                                            | +          | High                          |
| <i>ERCC8</i>  | +                                | + (Parallel G4)                 | +                  | +                                            | +          | High                          |
| <i>FAAP24</i> | +                                | + (Parallel G4)                 | -                  | +                                            | +          | High                          |
| <i>FANCA</i>  | -                                | -                               | -                  | -                                            | -          | Low                           |
| <i>FANCC</i>  | +                                | + (Parallel G4)                 | +                  | +                                            | +          | High                          |
| <i>FEN1</i>   | +                                | + (Parallel G4)                 | +                  | +                                            | +          | High                          |
| <i>GTF2H1</i> | +                                | + (Parallel G4)                 | +                  | +                                            | -          | High                          |
| <i>LIG4</i>   | +                                | -                               | -                  | +                                            | -          | Low                           |
| <i>MGMT</i>   | +                                | + (Mixed G4)                    | +                  | +                                            | +          | High                          |
| <i>MMS19</i>  | +                                | + (Mixed G4)                    | +                  | +                                            | +          | High                          |
| <i>NEIL1</i>  | +                                | + (Parallel G4)                 | +                  | +                                            | +          | High                          |
| <i>NEIL3</i>  | +                                | + (Mixed G4)                    | +                  | +                                            | +          | High                          |
| <i>NTHL1</i>  | +                                | + (Mixed G4)                    | +                  | +                                            | +          | High                          |
| <i>PARP3</i>  | +                                | + (Mixed G4)                    | +                  | +                                            | +          | High                          |
| <i>PCNA</i>   | +                                | + (Parallel G4)                 | +                  | +                                            | +          | High                          |
| <i>PMS1</i>   | +                                | + (Parallel G4)                 | +                  | +                                            | +          | High                          |
| <i>POLB</i>   | +                                | + (Parallel G4)                 | +                  | +                                            | +          | High                          |
| <i>POLH</i>   | +                                | + (Parallel G4)                 | +                  | +                                            | +          | High                          |
| <i>POLL</i>   | +                                | + (Parallel G4)                 | +                  | +                                            | +          | High                          |
| <i>POLZ</i>   | +                                | + (Parallel G4)                 | +                  | +                                            | +          | High                          |
| <i>PRKDC</i>  | +                                | -                               | -                  | +                                            | +          | Medium                        |
| <i>RAD9A</i>  | +                                | + (Parallel G4)                 | +                  | +                                            | +          | High                          |
| <i>RAD17</i>  | +                                | + (Hybrid G4)                   | +                  | +                                            | +          | High                          |
| <i>RAD54L</i> | +                                | + (Parallel G4)                 | +                  | +                                            | -          | High                          |
| <i>RECQL</i>  | +                                | -                               | -                  | +                                            | -          | Low                           |
| <i>REV1</i>   | +                                | + (Parallel G4)                 | +                  | +                                            | +          | High                          |
| <i>RPA1</i>   | -                                | -                               | +                  | -                                            | -          | Low                           |
| <i>UBE2B</i>  | +                                | + (Parallel G4)                 | +                  | +                                            | +          | High                          |
| <i>WRN</i>    | +                                | + (Parallel G4)                 | +                  | +                                            | +          | High                          |
| <i>XAB2</i>   | +                                | + (Mixed G4)                    | +                  | +                                            | +          | High                          |

## References

1. Allgayer, J., Kitsera, N., Bartelt, S., Epe, B., and Khobta, A. (2016) Widespread transcriptional gene inactivation initiated by a repair intermediate of 8-oxoguanine. *Nucleic Acids Res.* **44**, 7267-7280.
2. You, C., Dai, X., Yuan, B., Wang, J., Brooks, P. J., Niedernhofer, L. J., and Wang, Y. (2012) A quantitative assay for assessing the effects of DNA lesions on transcription. *Nat. Chem. Biol.* **8**, 817-822.
3. Fleming, A. M., Zhou, J., Wallace, S. S., and Burrows, C. J. (2015) A role for the fifth G-track in G-quadruplex forming oncogene promoter sequences during oxidative stress: Do these "spare tires" have an evolved function? *ACS Cent. Sci.* **1**, 226-233.
4. Riedl, J., Fleming, A. M., and Burrows, C. J. (2015) Sequencing of DNA lesions facilitated by site-specific excision via base excision repair DNA glycosylases yielding ligatable gaps. *J. Am. Chem. Soc.* **138**, 491-494.
